# Determinants of accelerated metabolomic and epigenetic ageing in a UK cohort

Oliver Robinson<sup>1</sup>, Marc Chadeau Hyam<sup>1</sup>, Ibrahim Karaman<sup>1</sup>, Rui Climaco Pinto<sup>1</sup>, Giovanni Fiorito<sup>2</sup>, He Gao<sup>1</sup>, Andy Heard<sup>1</sup>, Marjo-Riitta Jarvelin<sup>1</sup>, Mathew Lewis<sup>3</sup>, Raha Pazoki<sup>1</sup>, Silvia Polidoro<sup>2</sup>, Ioanna Tzoulaki<sup>1</sup>, Matthias Wielscher<sup>1</sup>, Paul Elliott<sup>1</sup>, Paolo Vineis<sup>1,2</sup>

1. MRC- PHE Centre for Environment and Health, Imperial College London, St. Mary's Campus Paddington, W2 1PG, London, United Kingdom.
2. Italian Institute for Genomic Medicine (IIGM, former HuGeF), Via Nizza 52 –, 10126, Turin, Italy.
3. Division of Computational and Systems Medicine, Department of Surgery and Cancer. Imperial College London. South Kensington Campus, SW7 2AZ, London UK

## Abstract

Markers of biological ageing have potential utility in primary care and public health. We developed an elastic net regression model of age based on untargeted metabolic profiling across multiple platforms, including nuclear magnetic resonance spectroscopy and liquid chromatography-mass spectrometry in urine and serum (almost 100,000 features assayed), within a large sample (N=2,239) from the UK occupational Airwave cohort. We investigated the determinants of accelerated ageing, including genetic, lifestyle and psychological risk factors for premature mortality. The metabolomic age model was well correlated with chronological age ( $r=0.85$  in independent test set). Increased metabolomic age acceleration (mAA) was associated ( $p<0.0025$ ) with overweight/obesity and depression and nominally associated ( $p<0.05$ ) with high alcohol use and low income. DNA methylation age acceleration (N=1,102) was nominally associated ( $p<0.05$ ) with high alcohol use, anxiety and post-traumatic stress disorder, but not correlated with mAA. Biological age acceleration may present an important mechanism linking psycho-social stress to age-related disease.

## Introduction

Ageing can be defined as the “time-dependent decline of functional capacity and stress resistance, associated with increased risk of morbidity and mortality” (Burkle et al., 2015). Environmental stressors, including social adversity (Fiorito et al., 2017; Stringhini et al., 2017), psychological disorders (Chiu et al., 2018; Wolf & Morrison, 2017), and genetic factors (McDaid et al., 2017) may influence the ageing process, leading to differing ageing rates. Traditionally, quantitative assessment of “the rate of ageing” relies on the analysis of mortality curves of populations. However, at the level of a living individual, this method does not allow assessment of the state of ageing (i.e. the state of the functional decline) and a prediction of the risk of morbidity and remaining life expectancy. Therefore, markers of ‘biological age’ (the ageing state typical of one’s chronological age) that can be assessed at any point in the lifespan therefore, may have enormous potential in both personalised medicine and public health. Since ageing is a process that affects almost all tissues and organs of the body and involves cross-talk between multiple physiological systems, there

43 has been increased research into composite markers of ageing, involving multiple  
44 parameters (Jylhävä, Pedersen, & Hägg, 2017). Levine (Levine, 2013) employed 10  
45 biomarkers representing multiple systems to develop a biological age score, that could better  
46 predict mortality than chronological age. Belsky *et al.* (Belsky et al., 2015) used a similar  
47 selection of biomarkers measured longitudinally in young adults to develop a biological age  
48 score and found that increased pace of ageing was associated with measures of functional  
49 decline such as cognitive ability. Modern ‘omics’ platforms have provided new opportunities  
50 for the systematic assessment of biological ageing. For example, Horvath (Horvath, 2013)  
51 and Hannum *et al.* (Hannum et al., 2013) employed genome-wide DNA methylation to  
52 develop highly predictive models of age based on multiple methylated CpG loci.  
53 Furthermore, it has been shown that ‘age acceleration’, defined as having a greater DNA  
54 methylation age than chronological age, is associated with multiple risk factors of mortality  
55 such as low social class, smoking, and alcohol use (Fiorito et al., 2017) and is predictive of  
56 mortality (B. H. Chen et al., 2016; Dugue et al., 2018). Agnostic metabolomics is a promising  
57 candidate technology to develop biomarkers of ageing. Several metabolomic studies have  
58 found strong associations between numerous metabolites and age, although in a limited  
59 sample size (Chaleckis, Murakami, Takada, Kondoh, & Yanagida, 2016; Rist et al., 2017) or  
60 through employing targeted analyses that give limited coverage of the full metabolome (Auro  
61 et al., 2014) (Hertel et al., 2016; Yu et al., 2012). Only the study of Hertel *et al.* (Hertel et al.,  
62 2016) combined a small set of markers to provide an overall assessment of biological  
63 ageing, observing that the predicted metabolomic age was associated with time to death,  
64 after adjustment for chronological age and other risk factors.

65 In the present study, we have employed untargeted metabolomics across multiple analytical  
66 platforms, providing unprecedented metabolome coverage (almost 100,000 features  
67 assayed), to develop a predictive model of age, within a large sample from the UK  
68 occupational Airwave cohort. A second cohort was used for longitudinal validation of  
69 selected metabolic age predictors. We have explored the relationship between metabolomic  
70 age and DNA methylation age and lifespan associated genetic factors. Furthermore, we  
71 have investigated the determinants of accelerated ageing, focussing on risk factors of  
72 premature mortality, including the WHO “25 x 25” risk factors (World Health Organisation,  
73 2013) (hypertension, diabetes, obesity, smoking, alcohol use and physical inactivity) and  
74 socio-economic and psychological risk factors (income, depression, anxiety, post-traumatic  
75 stress disorder (PTSD)). We show that obesity and depression are associated with  
76 accelerated metabolomic ageing.

## 77 Results

### 78 Building and validation of the metabolomic age model

79 The study population included 2,238 participants of the AIRWAVE cohort that had full  
80 metabolomic data. 60.5% of participants were male and mean age was 41.24 years (SD:  
81 9.1, range: 19.2 – 65.2 years). Most participants (97.5%) were of white British ethnicity and  
82 27.8% of participants were educated to degree level. The demographic characteristics of this  
83 sample are representative of the wider cohort (Elliott et al., 2014). Further covariate  
84 information is provided in table 1.

85

86 **Table 1: Demographic and covariate information of participants with metabolomic**  
 87 **data, and bivariate associations with metabolomic age acceleration**

|                                            |                          | N (%) or Mean (SD) | $\beta$ (95% CI)    | p value |
|--------------------------------------------|--------------------------|--------------------|---------------------|---------|
| <b>DEMOGRAPHIC AND NCD RISK FACTORS</b>    |                          |                    |                     |         |
| <b>AGE</b>                                 | years                    | 41.24 (9.1)        | -                   | -       |
| <b>SEX</b>                                 | Female                   | 884 (39.5)         | -                   | -       |
|                                            | Male                     | 1354 (60.5)        | -0.01 (-0.26, 0.24) | 0.94    |
| <b>MARITAL STATUS</b>                      | Married/cohabiting       | 1751 (80.2)        | -                   | -       |
|                                            | other                    | 431 (19.8)         | 0.11 (-0.2, 0.41)   | 0.5     |
| <b>ETHNICITY</b>                           | White                    | 2181 (97.5)        | -                   | -       |
|                                            | other                    | 56 (2.5)           | -0.37 (-1.14, 0.4)  | 0.35    |
| <b>BODY MASS INDEX</b>                     | <25                      | 731 (32.7)         | -                   | -       |
|                                            | >=25 & < 30 (overweight) | 1041 (46.5)        | 0.5 (0.23, 0.77)    | 0.00035 |
|                                            | >=30 (obese)             | 466 (20.8)         | 1.01 (0.67, 1.34)   | 4.6E-09 |
| <b>DIABETIC STATUS</b>                     | Normal                   | 2157 (96.4)        | -                   | -       |
|                                            | Diabetic                 | 80 (3.6)           | 0.78 (0.13, 1.42)   | 0.019   |
| <b>HYPERTENSION</b>                        | No                       | 1540 (68.8)        | -                   | -       |
|                                            | Yes                      | 697 (31.2)         | 0.20 (-0.06, 0.46)  | 0.13    |
| <b>INCOME</b>                              | High                     | 879 (39.4)         | -                   | -       |
|                                            | Medium                   | 812 (36.4)         | 0.26 (-0.01, 0.54)  | 0.062   |
|                                            | Low                      | 538 (24.1)         | 0.2 (-0.11, 0.51)   | 0.2     |
| <b>ALCOHOL CONSUMPTION</b>                 | None                     | 174 (7.8)          | -                   | -       |
|                                            | Moderate                 | 1876 (83.9)        | 0.13 (-0.32, 0.58)  | 0.57    |
|                                            | Heavy                    | 187 (8.4)          | 1.02 (0.42, 1.62)   | 0.00085 |
| <b>SMOKING</b>                             | Non-smoker               | 1539 (68.8)        | -                   | -       |
|                                            | Former smoker            | 477 (21.3)         | 0.41 (0.11, 0.7)    | 0.0077  |
|                                            | Current smoker           | 221 (9.9)          | -0.23 (-0.64, 0.18) | 0.28    |
| <b>PHYSICAL ACTIVITY</b>                   | High                     | 1305 (58.3)        | -                   | -       |
|                                            | Moderate                 | 585 (26.1)         | -0.21 (-0.5, 0.07)  | 0.14    |
|                                            | Low                      | 348 (15.5)         | 0.21 (-0.13, 0.56)  | 0.23    |
| <b>PSYCHOLOGICAL FACTORS</b>               |                          |                    |                     |         |
| <b>DEPRESSION DIAGNOSIS</b>                | Normal                   | 1545 (69.1)        | -                   | -       |
|                                            | Minimal symptoms         | 501 (22.4)         | 0.45 (0.16, 0.74)   | 0.0023  |
|                                            | Depression               | 191 (8.5)          | 0.91 (0.47, 1.34)   | 4.5E-05 |
| <b>ANXIETY DIAGNOSIS</b>                   | Normal                   | 1733 (79)          | -                   | -       |
|                                            | Borderline               | 274 (12.5)         | 0.20 (-0.17, 0.56)  | 0.3     |
|                                            | Anxiety case             | 188 (8.6)          | 0.52 (0.09, 0.96)   | 0.019   |
| <b>EXPERIENCED TRAUMA IN LAST 6 MONTHS</b> | No                       | 1896 (84.7)        | -                   | -       |
|                                            | Yes, without PTSD        | 261 (11.7)         | 0.14 (-0.24, 0.51)  | 0.47    |
|                                            | Yes, with PTSD           | 81 (3.6)           | 0.42 (-0.22, 1.07)  | 0.2     |
| <b>DIETARY VARIABLES</b>                   |                          |                    |                     |         |

|                                 |                     |                |                     |         |
|---------------------------------|---------------------|----------------|---------------------|---------|
| <b>FISH CONSUMPTION</b>         | None                | 541 (28.6)     | -                   | -       |
|                                 | Medium              | 697 (36.8)     | 0.25 (-0.08, 0.58)  | 0.14    |
|                                 | High                | 654 (34.6)     | 0.51 (0.17, 0.84)   | 0.0029  |
| <b>FRUIT CONSUMPTION</b>        | Low                 | 634 (33.5)     | -                   | -       |
|                                 | Medium              | 637 (33.7)     | 0.11 (-0.22, 0.43)  | 0.51    |
|                                 | High                | 621 (32.8)     | 0.11 (-0.21, 0.44)  | 0.50    |
| <b>RED MEAT CONSUMPTION</b>     | Low                 | 580 (30.7)     | -                   | -       |
|                                 | Medium              | 704 (37.2)     | 0.21 (-0.11, 0.54)  | 0.20    |
|                                 | High                | 608 (32.1)     | 0.12 (-0.22, 0.45)  | 0.49    |
| <b>VEGETABLE CONSUMPTION</b>    | Low                 | 23 (1.2)       | -                   | -       |
|                                 | Medium              | 627 (33.1)     | 0.17 (-0.16, 0.5)   | 0.31    |
|                                 | High                | 617 (32.6)     | 0.08 (-0.24, 0.41)  | 0.61    |
| <b>WHOLE GRAIN CONSUMPTION</b>  | Low                 | 648 (34.2)     | -                   | -       |
|                                 | Medium              | 604 (31.9)     | 0.23 (-0.1, 0.56)   | 0.17    |
|                                 | High                | 661 (34.9)     | 0.17 (-0.15, 0.49)  | 0.3     |
| <b>DASH SCORE</b>               | <20 (least healthy) | 344 (18.2)     | -                   | -       |
|                                 | ≥20 and <23         | 357 (18.9)     | 0.54 (0.1, 0.97)    | 0.015   |
|                                 | ≥23 and <25         | 297 (15.7)     | 0.18 (-0.28, 0.63)  | 0.45    |
|                                 | ≥25 and <28         | 396 (20.9)     | 0.67 (0.24, 1.09)   | 0.002   |
|                                 | > 28 (most healthy) | 498 (26.3)     | 0.23 (-0.17, 0.64)  | 0.26    |
| <b>MEDITERRANEAN DIET SCORE</b> | continuous (1-10)   | 4.73 (1.82)    | -0.03 (-0.11, 0.04) | 0.35    |
| <b>CLINICAL BIOMARKERS</b>      |                     |                |                     |         |
| <b>SYSTOLIC BLOOD PRESSURE</b>  | mmHg                | 130.85 (15.21) | 0.01 (0, 0.01)      | 0.082   |
| <b>DIASTOLIC BLOOD PRESSURE</b> | mmHg                | 79.67 (10.1)   | 0.01 (-0.01, 0.02)  | 0.28    |
| <b>PULSE</b>                    | beats/minute        | 70.37 (11.44)  | 0 (-0.01, 0.01)     | 0.76    |
| <b>FIBRINOGEN</b>               | g/L                 | 3.87 (0.88)    | 0.02 (-0.12, 0.16)  | 0.75    |
| <b>PROTHROMBIN TIME</b>         | seconds             | 13.64 (1.41)   | -0.08 (-0.17, 0)    | 0.058   |
| <b>C-REACTIVE PROTEIN</b>       | mg/l                | 1.92 (3.1)     | 0.02 (-0.02, 0.06)  | 0.40    |
| <b>CREATININE</b>               | μmol / L            | 92.35 (12.73)  | 0.01 (0, 0.02)      | 0.017   |
| <b>TOTAL CHOLESTEROL</b>        | mmol/l              | 5.25 (1.01)    | 0.41 (0.29, 0.53)   | 9.6E-12 |
| <b>HIGH DENSITY LIPOPROTEIN</b> | mmol/L              | 1.5 (0.39)     | 0.06 (-0.24, 0.37)  | 0.68    |
| <b>Γ-GLUTAMYL TRANSFERASE</b>   | U/L                 | 31.35 (24.06)  | 0.01 (0.01, 0.02)   | 1.7E-05 |
| <b>APOLIPOPROTEIN A</b>         | g/L                 | 1.35 (0.3)     | -0.14 (-0.54, 0.25) | 0.48    |
| <b>APOLIPOPROTEIN B</b>         | g/L                 | 0.93 (0.23)    | 1.55 (1.04, 2.07)   | 3.9E-09 |
| <b>% GLYCATED HAEMOGLOBIN</b>   | %                   | 5.63 (0.48)    | 0.32 (0.07, 0.57)   | 0.013   |
| <b>UREA</b>                     | μmol / L            | 5.04 (1.17)    | 0.08 (-0.02, 0.18)  | 0.12    |

88

89 Metabolomic data were acquired from both urine and serum samples using multiple Nuclear  
 90 Magnetic Resonance Spectroscopy (NMR) and Ultra-Performance Liquid Chromatography -  
 91 Mass Spectrometry (UPLC-MS) platforms, providing in total nine different metabolomic data

92 types (table s1). For purposes of constructing the main predictive model of age through  
93 elastic net regression, these data types were combined into one metabolomic dataset, giving  
94 a total of 98,824 metabolic features.

95 In the first stage of model building, an analysis by metabolomic platform (sequentially leaving  
96 on platform out each time) indicated that predictive performance (minimisation of mean  
97 squared error in 10-fold cross validation) was improved through using only the four following  
98 platforms (figure s1): Bruker IVDr Lipoprotein Subclass Analysis derived from NMR in serum  
99 (“sBiLISA”), lipid-targeted reverse-phase UPLC-MS in positive mode in serum (“sLPOS”),  
100 reverse-phase UPLC-MS in positive mode in urine (“uRPOS”) and hydrophilic interaction  
101 UPLC-MS in positive mode in urine (“uHPOS”) to give a total of 28941 metabolic features.  
102 The final predictive model selected 525 predictors from across this set (see table s2 for list of  
103 predictors along with table s3 annotation information), including 8 lipoprotein subclasses  
104 from sBiLISA and 219, 104 and 194 features (retention time-m/z pairs) from the sLPOS,  
105 uHPOS and uRPOS platforms respectively. The model predicted age with high accuracy  
106 (mean absolute error, (MAE) = 1.47 years) in the building data set (80% of data n= 1790),  
107 with a correlation between chronological age and predicted age of 0.96 (figure 1a). When  
108 this model was applied to the independent validation dataset, consisting of the remaining  
109 20% of study participants (N = 448), the MAE was 3.80 years and the correlation between  
110 predicted age and chronological age was 0.85 (figure 1a).

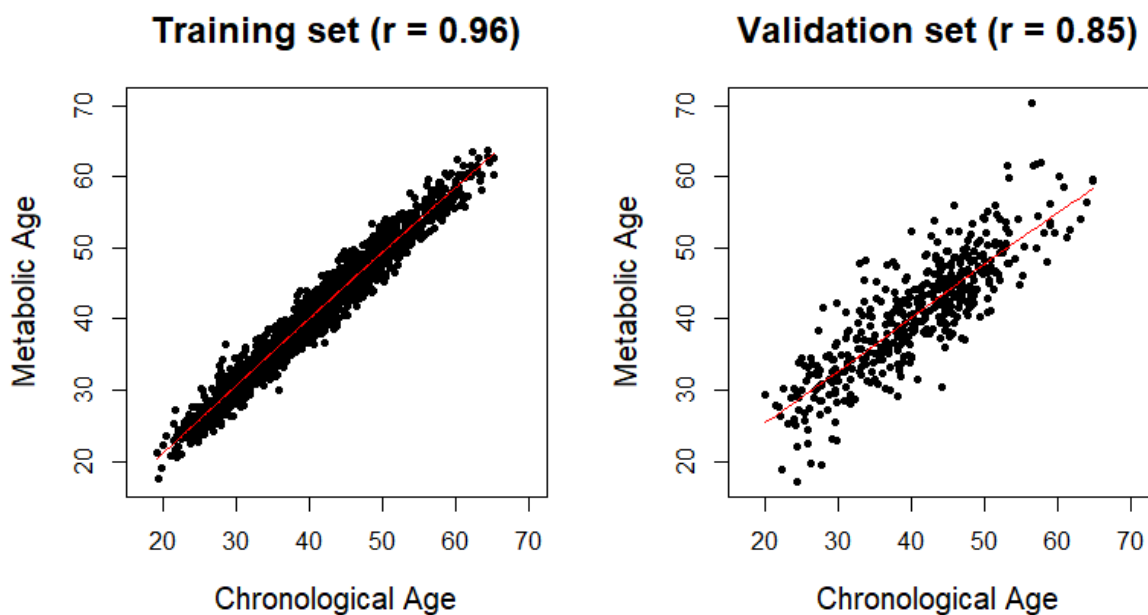

111

112 **Figure 1: Summary of metabolomic age prediction model. A: Predicted age plotted**  
113 **against chronological age in training set. Pearson’s correlation coefficient (r) is**  
114 **shown. B: Predicted age plotted against chronological age in test set. Pearson’s**  
115 **correlation coefficient (r) is shown**

116 Pathway enrichment analysis, using the *Mummichog* algorithm performed across the UPLC-  
117 MS derived model predictors, identified enrichment ( $p < 0.05$ ) in eleven metabolic pathways  
118 (table 2): Vitamin E metabolism, Tryptophan metabolism, CoA Catabolism, Urea cycle/amino  
119 group metabolism, Lysine metabolism, Carnitine shuttle, Vitamin B5 - CoA biosynthesis from  
120 pantothenate, Biopterin metabolism, Drug metabolism - cytochrome P450, Tyrosine  
121 metabolism, and Aspartate and asparagine metabolism.

122 **Table 2: Significantly enriched metabolic pathways among metabolomic age**  
 123 **predictors**

| PATHWAYS                                        | OVERLAP SIZE | PATHWAY SIZE | P-VALUE |
|-------------------------------------------------|--------------|--------------|---------|
| VITAMIN E METABOLISM                            | 15           | 37           | 0.00128 |
| TRYPTOPHAN METABOLISM                           | 23           | 69           | 0.00165 |
| COA CATABOLISM                                  | 4            | 6            | 0.00255 |
| UREA CYCLE/AMINO GROUP METABOLISM               | 17           | 52           | 0.0027  |
| LYSINE METABOLISM                               | 10           | 29           | 0.00452 |
| CARNITINE SHUTTLE                               | 11           | 33           | 0.00476 |
| VITAMIN B5 - COA BIOSYNTHESIS FROM PANTOTHENATE | 5            | 11           | 0.00492 |
| BIOPTERIN METABOLISM                            | 6            | 15           | 0.00563 |
| DRUG METABOLISM - CYTOCHROME P450               | 15           | 52           | 0.00942 |
| TYROSINE METABOLISM                             | 24           | 91           | 0.0146  |
| ASPARTATE AND ASPARAGINE METABOLISM             | 18           | 71           | 0.03215 |

124

125 We examined concentration changes of nine metabolites included in our age prediction  
 126 model, that were available in an independent cohort, the Northern Finnish Birth Cohort 1966,  
 127 that had serum NMR metabolomic data measured at two ages, 31 and 46 yrs, among 2144  
 128 individuals. Seven of these metabolites (77%) changed significantly with age ( $p < 0.05$ ), in  
 129 the same direction as predicted in the metabolomic age model (table 3).

130 **Table 3: Validation of selected metabolomic age predictors in the Northern Finnish**  
 131 **Birth Cohort**

| PLATFORM | FEATURE NAME         | MOLECULE                                                                  | CO-EFFICIENT IN AIRWAVE <sup>A</sup> | MEAN CHANGE IN NFBC <sup>B</sup> (SD) | P VALUE IN NFBC |
|----------|----------------------|---------------------------------------------------------------------------|--------------------------------------|---------------------------------------|-----------------|
| U_RPOS   | 1.49_154.0<br>844m/z | L-Leucine                                                                 | -0.24                                | -0.05<br>(0.19)                       | 2.20E-12        |
| U_RPOS   | 1.10_147.0<br>285m/z | Citrate                                                                   | 0.20                                 | 0.11 (0.21)                           | 2.20E-12        |
| S_BILISA | IDPL                 | Phospholipids in intermediate density lipoproteins                        | -0.20                                | 0.09 (0.23)                           | 1               |
| S_BILISA | HDTG                 | Triglycerides in high density lipoproteins                                | 0.20                                 | 0.01 (0.36)                           | 0.08            |
| S_BILISA | L3TG                 | Triglycerides in low density lipoproteins (medium size subclass)          | 0.12                                 | 0.01 (0.46)                           | 2.20E-12        |
| S_BILISA | V6TG                 | Triglycerides in very low density lipoproteins (smallest size 6 subclass) | -0.37                                | -0.02<br>(0.35)                       | 0.004           |
| S_BILISA | V6CH                 | Cholesterol in very low density lipoproteins (smallest size 6 subclass)   | -0.44                                | -0.03<br>(0.23)                       | 9.60E-10        |
| S_BILISA | TPA1                 | Apo-A1 in total plasma                                                    | 0.31                                 | 0.05 (0.15)                           | 2.20E-12        |
| S_BILISA | H1TG                 | Triglycerides in high density lipoproteins (largest size 1 subclass)      | 0.20                                 | 0.02 (0.46)                           | 5.00E-02        |

132 <sup>A</sup> Per standard deviation change in feature intensity. <sup>B</sup> Mean difference between measurements at 31  
 133 and 46 years. NFBC = Northern Finnish Birth Cohort 1966

### 134 Metabolomic age, DNA methylation and genetic predictors of longevity

135 DNA methylation age was assessed for 1102 participants. Demographic characteristics for  
 136 this sample were similar to those for participants with metabolomic age available (table s4).  
 137 DNA methylation age predicted chronological age with a MAE of 4.37 years. DNA  
 138 methylation age was strongly correlated with chronological age ( $r=0.91$ , figure 2a) and

139 metabolomic age ( $n = 837$ ,  $r = 0.85$ , figure 2b). Age acceleration scores were derived for  
140 both DNA methylation age acceleration (DNAmAA) and metabolomic age acceleration  
141 (mAA), as the difference, at a given age, between actual and predicted age. However, no  
142 correlation was observed between DNAmAA and mAA ( $r = 0.02$ , figure 2c).

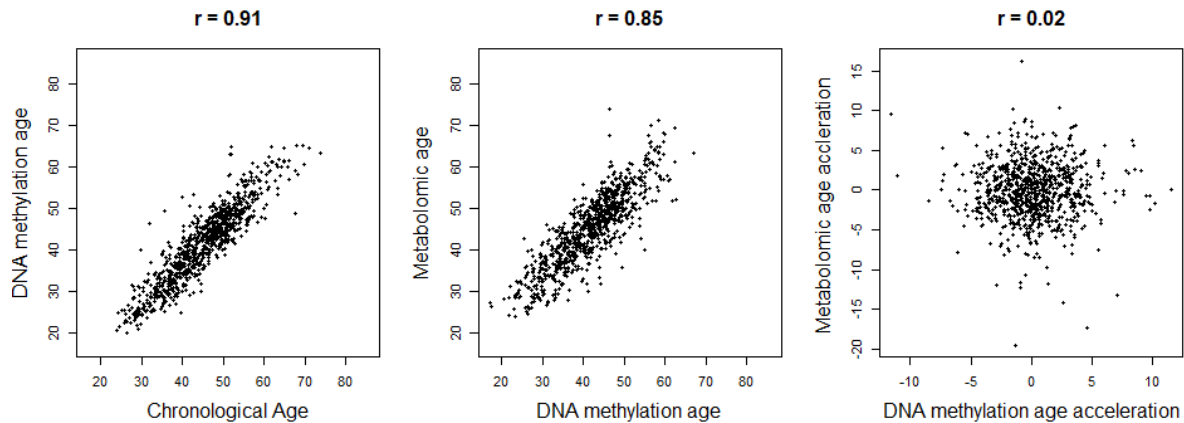

143

144 **Figure 2: Relationships between different age measures. A. DNA methylation age**  
145 **plotted against chronological age. B: metabolic age plotted against DNA methylation**  
146 **age. C. MetAA plotted against DNAmethAA. Pearson's correlation coefficients ( $r$ ) are**  
147 **shown**

148 Table s5 shows mean age acceleration scores by genotype for 10 single nucleotide  
149 polymorphisms (SNPs), that have robust associations with parental attained age, identified  
150 in two recent studies within the UK Biobank (Joshi et al., 2017; Pilling et al., 2017).  
151 Associations of borderline nominal significance that were consistent with genetic effects on  
152 lifespan (i.e. age acceleration increases with genotype associated with shorter lifespan or  
153 *visa versa*) were observed only for a SNP in *APOE* locus with both mAA ( $p = 0.05$ ) and  
154 DNAmAA ( $p = 0.07$ ). A weighted genetic risk score (GRS) for shortened lifespan (derived  
155 from these 10 SNPs) increased mAA by 1.55 (95% confidence interval (CI): -1.71, 4.81) and  
156 DNAmAA by 2.87 (95% CI: -1.56, 7.29) per GIS unit, although this was not statistically  
157 significant ( $p = 0.35$  with mAA and  $p = 0.20$  with DNAmAA).

### 158 Risk factors of age acceleration

159 In bivariate analyses (table 1) we observed increased mAA ( $p < 0.05$ ) among participants  
160 who were diabetic, heavy drinkers, overweight or obese, former smokers, or were suffering  
161 from depression, anxiety or PTSD. Clinical biomarkers associated with mAA included  
162 creatinine, total cholesterol,  $\gamma$ -glutamyl transferase (GGT) apolipoprotein B and glycated  
163 haemoglobin (%HbA1C). Regarding dietary intake in the week prior to sampling, those who  
164 reported high fish consumption and those in the second or fourth quintiles of the DASH  
165 score (compared to the first quintile, the least healthy dietary pattern) also had increased  
166 mAA. In bivariate analyses with DNAmAA (table s4), sex was associated at  $p < 0.05$ , with an  
167 increase in DNAmAA of 0.89 (interpretable as years of increase in DNA methylation age,  
168 95% CI: 0.47, 1.30) in men compared to women. Clinical biomarkers associated with  
169 DNAmAA in bivariate analyses included creatinine, high density lipoproteins, GGT and  
170 apolipoprotein A.

171 Table 5 shows adjusted associations with mAA and DNAmAA for non-communicable  
172 disease and psychological risk factors (adjusted for sex, ethnicity, study centre, income,  
173 hypertension, diabetes, BMI, smoking, alcohol intake, physical activity, DASH score and fish  
174 consumption). We observed nominally significant increases ( $p < 0.05$ ) in mAA with

175 overweight, obesity, heavy drinking, lower income, depressive symptoms and depression,  
 176 ranging from 0.35 (95% CI: 0.01, 0.69) for low income compared to those with high income,  
 177 to 0.97 (95% CI: 0.57, 1.37) for obesity compared to those of normal weight. Significant  
 178 increases in DNAmAA were observed with heavy drinking, anxiety and PTSD, ranging 0.92  
 179 (95% CI: 0.03, 1.80) for anxiety compared to those without anxiety symptoms, to 2.15 (95%  
 180 CI: 0.31, 4.00) for PTSD compared to those who had not experienced trauma in the past six  
 181 months. Associations between overweight/obesity and depression and mAA remained  
 182 significant ( $p < 0.0025$ ) after correction for multiple testing.

183 **Table 5: Adjusted associations between disease risk factors and age acceleration**  
 184 **scores**

|                                                    |                                  | ADJUSTED ASSOCIATIONS<br>WITH METABOLOMIC AGE<br>ACCELERATION |          | ADJUSTED<br>ASSOCIATIONS WITH<br>DNA METHYLATION AGE<br>ACCELERATION |         |
|----------------------------------------------------|----------------------------------|---------------------------------------------------------------|----------|----------------------------------------------------------------------|---------|
|                                                    |                                  | $\beta$ (95% CI)                                              | p value  | $\beta$ (95% CI)                                                     | p value |
| <b>DIABETIC STATUS</b>                             | Normal                           | -                                                             | -        | -                                                                    | -       |
|                                                    | Diabetic                         | 0.34 (-0.41, 1.1)                                             | 0.37     | 0.54 (-0.75, 1.83)                                                   | 0.41    |
| <b>HYPERTENSION</b>                                | No                               | -                                                             | -        | -                                                                    | -       |
|                                                    | Yes                              | -0.05 (-0.36, 0.25)                                           | 0.73     | -0.12 (-0.66, 0.42)                                                  | 0.66    |
| <b>INCOME</b>                                      | High                             | -                                                             | -        | -                                                                    | -       |
|                                                    | Medium                           | 0.36 (0.06, 0.67)                                             | 0.019    | -0.01 (-0.55, 0.54)                                                  | 0.98    |
|                                                    | Low                              | 0.35 (0.01, 0.69)                                             | 0.042    | 0.50 (-0.10, 1.10)                                                   | 0.10    |
| <b>ALCOHOL<br/>CONSUMPTION</b>                     | None                             | -                                                             | -        | -                                                                    | -       |
|                                                    | Moderate                         | 0.08 (-0.42, 0.58)                                            | 0.75     | 0.67 (-0.28, 1.61)                                                   | 0.17    |
|                                                    | Heavy                            | 0.91 (0.23, 1.58)                                             | 0.008    | 1.37 (0.09, 2.64)                                                    | 0.036   |
| <b>BMI</b>                                         | <25                              | -                                                             | -        | -                                                                    | -       |
|                                                    | $\geq 25$ & < 30<br>(overweight) | 0.57 (0.26, 0.89)                                             | 4.2E-04* | 0.04 (-0.51, 0.6)                                                    | 0.88    |
|                                                    | $\geq 30$ (obese)                | 0.97 (0.57, 1.37)                                             | 2.1E-06* | 0.11 (-0.61, 0.82)                                                   | 0.77    |
| <b>SMOKING</b>                                     | Non-smoker                       | -                                                             | -        | -                                                                    | -       |
|                                                    | Former smoker                    | 0.29 (-0.04, 0.62)                                            | 0.086    | -0.13 (-0.69, 0.42)                                                  | 0.64    |
|                                                    | Current smoker                   | -0.32 (-0.77, 0.13)                                           | 0.17     | -0.6 (-1.41, 0.2)                                                    | 0.14    |
| <b>PHYSICAL<br/>ACTIVITY</b>                       | High                             | -                                                             | -        | -                                                                    | -       |
|                                                    | Moderate                         | -0.28 (-0.59, 0.03)                                           | 0.074    | -0.28 (-0.83, 0.27)                                                  | 0.32    |
| <b>DEPRESSION<br/>DIAGNOSIS</b>                    | Low                              | 0.22 (-0.16, 0.6)                                             | 0.26     | -0.11 (-0.77, 0.56)                                                  | 0.75    |
|                                                    | Normal                           | -                                                             | -        | -                                                                    | -       |
|                                                    | Minimal<br>symptoms              | 0.38 (0.05, 0.7)                                              | 0.023    | 0.20 (-0.38, 0.78)                                                   | 0.50    |
| <b>ANXIETY<br/>DIAGNOSIS</b>                       | Depression                       | 0.74 (0.26, 1.22)                                             | 0.0024*  | 0.14 (-0.71, 0.99)                                                   | 0.75    |
|                                                    | Normal                           | -                                                             | -        | -                                                                    | -       |
|                                                    | Borderline                       | 0.11 (-0.29, 0.51)                                            | 0.59     | 0.03 (-0.67, 0.74)                                                   | 0.92    |
| <b>EXPERIENCED<br/>TRAUMA IN LAST 6<br/>MONTHS</b> | Anxiety case                     | 0.49 (-0.01, 0.98)                                            | 0.055    | 0.92 (0.03, 1.8)                                                     | 0.043   |
|                                                    | No                               | -                                                             | -        | -                                                                    | -       |
|                                                    | Yes, without<br>PTSD             | 0.29 (-0.11, 0.7)                                             | 0.16     | -0.22 (-0.9, 0.45)                                                   | 0.51    |
|                                                    | Yes, with PTSD                   | 0.59 (-0.13, 1.31)                                            | 0.11     | 2.15 (0.31, 4)                                                       | 0.022   |



185 *Models adjusted for sex, ethnicity, study centre, income, hypertension, diabetes, BMI, smoking,*  
186 *alcohol intake, physical activity, DASH score and fish consumption. \* indicates p values that pass*  
187 *multiple testing correction.*

## 188 Discussion

189 In an important proof of principle study, we have demonstrated in a large nationwide cohort  
190 study that metabolomic profiling may be used to predict chronological age with high  
191 accuracy among working age adults. We employed a wide range of metabolomic platforms  
192 to provide the broadest metabolome coverage yet presented in population-based studies.  
193 We found that metabolomic age acceleration, defined as having a greater predicted  
194 metabolomic age than chronological age, was associated, after multiple testing correction,  
195 with overweight/obesity and depression and nominally associated with low income and high  
196 alcohol intake. We did not observe an association between epigenetic age acceleration and  
197 metabolomic age acceleration, suggesting these measures capture separate aspects of the  
198 ageing process. We observed a different pattern of risk factors nominally associated with  
199 epigenetic accelerated ageing including being male, heavy drinking, anxiety and PTSD.

200 The correlation between chronological and predicted age, of our measure of metabolomic  
201 ageing ( $r= 0.86$  in the validation dataset), was somewhat lower than that of the Hannum  
202 epigenetic age clock in our cohort ( $r= 0.91$ ) but greater than reported for other biological  
203 ageing markers, including the measure based on urinary NMR data (Hertel et al., 2016) ( $r =$   
204  $0.53$  in men and  $0.61$  in women in validation dataset), the blood transcriptomic clock (Peters  
205 et al., 2015) ( $r = 0.35- 0.74$  depending on cohort) and telomere length ( $r \sim 0.3$  (Muezzinler,  
206 Zaineddin, & Brenner, 2013)). Biological ageing markers aim to better capture the body's  
207 rate of decline or physiological breakdown than chronological age itself and should therefore  
208 also be more predictive of mortality and age-related disease. The associations we observed  
209 between accelerated metabolomic ageing and factors known to increase risk of mortality,  
210 suggest that metabolomic age may capture this physiological decline.

211 Strong associations with mAA were observed with overweight and obesity. These conditions  
212 are forms of metabolic dysregulation and their additional metabolic burden may increase the  
213 rate of decline of the metabolic systems of the body. Genetic predisposition to longevity is  
214 associated with low levels of abdominal visceral fat (Sala et al., 2015) and many different  
215 conditions that prolong lifespan in animal models also improve obesity-related conditions.  
216 Furthermore, obesity has been linked to telomere shortening, and drastic measures to  
217 combat morbid obesity like bariatric surgery can actually cause a recovery in telomere length  
218 (Laimer et al., 2015). Much is now known about the ageing process at the molecular level  
219 primarily from experimental work. López-Otín et al. (López-Otín, Blasco, Partridge, Serrano,  
220 & Kroemer, 2013) proposed nine 'hallmarks of ageing' that may all be expected to have  
221 detectable effects on the metabolome and overlap significantly with the effects of metabolic  
222 disorders (López-Otín, Galluzzi, Freije, Madeo, & Kroemer, 2016). For instance, the hallmark  
223 'deregulated nutrient signalling' refers to pathways that sense and respond to nutrient  
224 availability such as "insulin and IGF1 signalling" (IIS) pathway, which is altered among  
225 diabetics.

226 We observed multiple metabolomic pathways enriched among the predictors of our  
227 metabolomic clock that reflect fundamental metabolic processes and are closely related to  
228 these hallmarks. We observed enrichment of the pathway related to metabolism of Vitamin  
229 E, a potent anti-oxidant and anti-inflammatory agent that protects cell membranes from  
230 oxidative damage that can induce genome instability (Claycombe & Meydani, 2001). As a  
231 primary hallmark, genome instability has far-reaching and complex consequences including  
232 altered nutrient sensing, energy metabolism and redox balance (Garinis, van der Horst, Vijg,

233 & H.J. Hoeijmakers, 2008). Many human progerias are disorders accompanied by the  
234 hyperactivation of DNA repair machinery dependent on nicotinamide adenine dinucleotide  
235 (NAD<sup>+</sup>). This hyperactivation leads to NAD<sup>+</sup> depletion, resulting in inhibition of the NAD<sup>+</sup>-  
236 dependent nutrient sensor sirtuin 1 (SIRT1) (Fang et al., 2014). Levels of NAD<sup>+</sup> are also  
237 affected by other factors including circadian rhythm disruption, chronic inflammation (Verdin,  
238 2015) and tryptophan metabolism (also enriched among the metabolomic clock predictors).  
239 The functional impairment of SIRT1 (Gomes et al., 2013), which limits expression of nuclear  
240 genes encoding mitochondrial proteins, leads directly to the hallmark mitochondrial  
241 dysfunction. We observed enrichment among the metabolomic clock predictors of the  
242 pathways CoA catabolism, Vitamin B5 - CoA biosynthesis from pantothenate and lysine  
243 metabolism, which all maintain acetyl-coA levels necessary for mitochondrial reactions, and  
244 carnitine shuttle, which is required for the transport of fatty acids for beta-oxidation in the  
245 mitochondria. The enrichment of these pathways suggests the importance of the  
246 mitochondrial dysfunction hallmark in our metabolomic ageing model. SIRT1 also contributes  
247 to regulating the circadian oscillation of acetyl-coA levels (Sahar et al., 2014) which has  
248 been linked to the ageing process (Chang & Guarente, 2013) and epigenetic alterations  
249 through acetylation (Su, Wellen, & Rabinowitz, 2016). Mitochondrial fitness further has  
250 impact on other ageing hallmarks (López-Otín et al., 2016), including genomic instability  
251 (dysfunctional mitochondria are major sources of genotoxic ROS), altered intercellular  
252 communication (ROS overgeneration is connected to the secretion of inflammatory  
253 mediators) and stem cell exhaustion (which are particularly sensitive to ROS (Ito et al.,  
254 2006)). The observed enrichment of the urea cycle and aspartate and asparagine  
255 metabolism pathways will also result from perturbation to the Krebs and urea cycles  
256 following changes in mitochondrial fitness.

257 The enrichment of the tryptophan, tyrosine and biopterin metabolic pathways appear to  
258 relate to the hallmark 'altered intercellular communication'. Tyrosine is required for signal  
259 transduction through incorporation into protein kinases, while tryptophan and biopterin are  
260 necessary for synthesis of neurotransmitters including dopamine, norepinephrine,  
261 epinephrine, serotonin and melatonin. Alterations to neurotransmitter levels may underlie  
262 the associations we observed between mAA with depressive symptoms and depression.  
263 Both psychological distress and major depression had similar hazard ratios for mortality in a  
264 recent prospective study (Chiu et al., 2018), which would be consistent with the observed  
265 increases in mAA for both depressive symptoms and depression. Anxiety was also  
266 associated with increased mAA, albeit a smaller increase than observed for depression.  
267 While in this cross-sectional study we cannot disentangle the causal direction between  
268 depression and mAA, a study of biological ageing among elderly people found that  
269 accelerated biological age was associated with depressive symptoms at baseline and was  
270 also predictive of depressive symptoms at follow-up (Brown et al., 2017). Consistent  
271 evidence demonstrates a bi-directional association between depression and so-called  
272 metabolic syndrome, suggesting common pathological roots (Marazziti, Rutigliano, Baroni,  
273 Landi, & Dell'Osso, 2014). Proposed pathophysiological commonalities include abnormal  
274 activation of the hypothalamic–pituitary–adrenal (HPA) axis and altered levels of circulating  
275 leptin and ghrelin, two peripheral hormones that are classically implicated in the homeostatic  
276 control of food intake. A large body of research has investigated the concept of 'allostatic  
277 load' whereby repeated activation of the HPA axis leads to biological 'wear and tear' or  
278 physiological decline of downstream metabolic, immune and cardiovascular systems  
279 (McEwen & Seeman, 1999). Many studies have demonstrated a link between social  
280 adversity (Castagne et al., 2018; Dowd, Simanek, & Aiello, 2009) and allostatic load and it is  
281 theorised that chronic stress associated with low socio-economic position leads to prolonged

282 activation of the HPA axis. We observed that lower income was nominally associated with  
283 increased mAA, which may similarly be considered to capture physiological decline.

284 We observed increases in DNAmAA associated with anxiety, PTSD and low income that  
285 were generally of greater size than for mAA. Meta-analyses have shown that both PTSD  
286 (Wolf & Morrison, 2017) and low socio-economic position (Fiorito et al., 2017) to be  
287 associated with increases in DNAmAA. We did not observe any evidence for an association  
288 between depression and DNAmAA, suggesting the two ageing measures may be sensitive  
289 to separate dimensions of mental health. The DNA methylation clock has been shown to  
290 perform well as marker of biological age since it is predictive of all-cause mortality, even  
291 after adjusting for chronological age and a variety of known risk factors, and is associated  
292 with physical measures of ageing such as frailty and cognitive decline (Horvath et al., 2016).  
293 However, other biological ageing markers may add value in capturing different aspects of the  
294 ageing process. Peters *et al.* (Peters et al., 2015) reported that transcriptomic age was only  
295 moderately correlated with DNA methylation age and the different measures were  
296 associated with different ageing phenotypes. Similarly, Belsky *et al.* (Belsky et al., 2016)  
297 report only weak correlations between telomere length, DNA methylation age, and a  
298 composite biomarker-based measure of biological ageing among young adults. While  
299 metabolomic and DNA methylation age were correlated in our study, there was no  
300 association between mAA and DNAmAA. DNAmAA has been shown to be predictive of  
301 cancer related mortality but not CVD (Dugue et al., 2018; Horvath et al., 2016) while the risk  
302 factors associated with mAA suggest it may be predictive of cardio-metabolic related  
303 disease. Accelerated transcriptomic age was found to be similarly associated with CVD risk  
304 factors, although it was not related to mental health (Peters et al., 2015). Further research  
305 into biological ageing may consider combining markers at different levels of biological  
306 organisation to provide a more complete picture of the ageing process.

307 There was suggestive evidence for a small association between the *APOE* gene and both  
308 mAA and DNAmAA. This gene has the strongest effects on attained age and is the only  
309 genetic variant replicated across populations in studies of human longevity (Partridge,  
310 Deelen, & Slagboom, 2018). It plays a key role in lipoprotein metabolism and has been  
311 associated with multiple are-related disorders including cognitive decline (De Jager et al.,  
312 2012) and Alzheimer's disease (Marioni et al., 2018) . The role of the *APOE* gene in these  
313 biological age markers, requires further study in larger, independent populations.

314 This study had some important limitations. The study was cross-sectional, based on a single  
315 biological sampling from participants at a wide range of ages. It is therefore difficult to  
316 separate processes relating to the ageing itself from cohort effects associated with the  
317 different environment of people at different ages. This is particularly a problem for analyses  
318 of the metabolome which contains both endogenous metabolites related to physiological  
319 processes such as ageing and short-lived exogenous metabolites related to factors such as  
320 diet and medication. Indeed, we observed that fish consumption, which is associated with  
321 reduced risk of mortality (Zhao et al., 2016), actually increased mAA, likely due to the  
322 confounding of our model by cohort effects. We addressed these points in two ways: Firstly,  
323 we validated some of the metabolomic age predictors that were available in an independent  
324 cohort at two timepoints (15 years apart) in the early adult life of the same individuals. We  
325 found that there were highly significant changes in levels of the majority of metabolites we  
326 checked, in the same direction as predicted by the metabolomic age model. Secondly, we  
327 adjusted associations with mAA for diet that had been assessed through a food diary in the  
328 week prior to sampling. Pathways that were enriched in our model were generally related to  
329 physiological processes known to be related to ageing, with the possible exception of the  
330 drug metabolism pathway. However, medication history was unavailable in this study. Also,

331 we did not have participants at the oldest ages (>65 yrs). It is known that biological ageing  
332 becomes more variable within the elderly and further work is required to test the  
333 performance of our modelling approach within older populations.

334 The use of untargeted metabolomics presents both strengths and limitations. Untargeted  
335 analyses reduce the potential to apply the full model in separate metabolomic datasets due  
336 to differences in retention time and mass accuracy in different runs of spectral acquisition.  
337 Furthermore, full laboratory annotation of all predictors was outside the scope of the present  
338 study and may not even be possible for some predictors without current database matches.  
339 However, the aim of the study was to develop an overall predictive model to assess  
340 metabolic ageing rather than identify individual predictors. Indeed, the nature of the variable  
341 selection method used means that an equally valid predictive model can be built on different  
342 sets of predictors. We used the *Mummichog* pathway analysis tool to extract information at  
343 the pathway level, as the algorithm bypasses laboratory annotation based on the assumption  
344 that misidentification will apply equally both to the feature set (metabolites included in the  
345 age prediction model) and the reference set (metabolites not selected into the model). The  
346 tool has been validated in separate datasets that have also undergone full laboratory  
347 annotation (Li et al., 2013). We incorporated a range of MS platforms able to detect both  
348 lipophilic and hydrophilic molecules at low concentrations and NMR platforms able to detect  
349 larger structures such as lipoproteins that would be destroyed during MS acquisition. We  
350 also analysed both serum and urine that contain different sets of metabolites – more  
351 lipophilic molecules in serum and more polar molecules that are present at higher  
352 concentrations in urine. Together, we were able to assay a large portion of the metabolome  
353 that would not be possible with current targeted methods.

354 Other strengths include the incorporation of genomic and DNA methylation data, the wide  
355 age range of participants including those in early adult life where ageing interventions may  
356 be most effective (Moffitt, Belsky, Danese, Poulton, & Caspi, 2017), and the use of validated  
357 psychological instruments. Future work will assess the effects of mAA on functional ageing  
358 measures and other health endpoints and assess metabolomic age in longitudinal, repeat  
359 samples.

360 In conclusion, we have developed a predictive indicator of aging based on broad  
361 metabolomic analysis among working age adults. We found that while mAA, the difference  
362 between metabolomic and chronological age, was not related to DNAmAA, it was associated  
363 with mortality risk factors including overweight/obesity, heavy alcohol use and psycho-social  
364 factors including depression and lower income. Biological age acceleration may be an  
365 important mechanism linking psycho-social stress to age-related disease. Advances in life  
366 expectancies have led to an increased prevalence of age-related morbidities. Targeting the  
367 process of ageing itself, through changes in living conditions, behaviours or therapeutic  
368 interventions, may help more people experience healthy ageing.

## 369 **Materials and Methods**

### 370 **Cohort and covariate information**

371 The Airwave Health Monitoring Study is an occupational cohort of employees of 28 police  
372 forces from across Great Britain. Full details of the cohort and methods are available in  
373 Elliott et al (Elliott et al., 2014). The study started recruitment in 2006 and now contains  
374 53,280 participants. The study received ethical approval from the National Health Service  
375 Multi-Site Research Ethics Committee (MREC/13/NW/0588). At the baseline health  
376 screening, participants underwent health examination, self-completed a computer  
377 questionnaire and provided urine and blood samples. Blood samples were spun at the health

378 clinic and the biological samples were stored in a Thermoporter (LaminarMedica) and sent  
379 overnight from the clinics for next-day analysis of standard clinical chemistry tests or were  
380 frozen at -80 °C long term storage. DNA samples and plasma for metabolomic analysis were  
381 extracted from blood collected in EDTA tubes.

382 Important covariates in the analysis were categorised from self-report or clinical data as  
383 follows: Ethnicity was defined as 'white' or otherwise. Marital status was defined as living  
384 with partner or otherwise. Income was defined as low, medium or high, based on terciles of  
385 total net household income after adjustment for the number of dependant household  
386 members. Alcohol use was classed as non-drinker, moderate drinker ( $\leq 14$  alcohol  
387 units/week for women and  $\leq 21$  alcohol units/week for men) or heavy drinker ( $> 14$  alcohol  
388 units/week for women and  $>21$  alcohol units/week for men). Hypertension was defined as  
389 either reported diagnosis or systolic blood pressure  $\geq 140$  mmHg or diastolic blood pressure  
390  $\geq 90$  mmHg. Diabetic status was defined as normal (no diagnosis and HbA1c  $< 6.5\%$ ), or  
391 diabetic (diagnosis or HbA1c  $\geq 6.5\%$ ). Physical activity was defined as low, moderate or high  
392 based on the scoring protocol of the International Physical Activity Questionnaire (The IPAQ  
393 group, 2016) .

### 394 Psychological instruments

395 The Patient Health Questionnaire – 9 depression questionnaire was used to define  
396 participants as “normal (i.e. no depression)”, “minimal symptoms of depression” or as a  
397 “depression case” (Kroenke, Spitzer, & Williams, 2001). The Hospital Anxiety and  
398 Depression Scale questionnaire was used to assess anxiety levels as “normal (i.e. no  
399 anxiety)”, “borderline” and “anxiety case” (Zigmond & Snaith, 1983). Participants were asked  
400 if they had experienced a work-related traumatic incident in the previous six months. Those  
401 who reported a traumatic incident were then asked to complete a brief screening instrument  
402 for post-traumatic stress disorder (PTSD) (Brewin et al., 2002). Participants were thus  
403 classed into three categories: “not experienced traumatic incident in past 6 months”,  
404 “experienced traumatic incident in past 6 months without leading to PTSD”, and  
405 “experienced traumatic incident in past 6 months leading to PTSD”,

### 406 Assessment of Diet

407 Dietary intake was measured using validated 7-day estimated weight food diaries as fully  
408 described previously (Gibson et al., 2017). Nutritional intake was calculated using  
409 Dietplan6.7 software (Forestfield Software, Horsham, UK) which is based on the McCance  
410 and Widdowson's 6th Edition Composition of Foods UK Nutritional Data set (UKN) by a team  
411 of trained coders trained to match food and drink items to the UKN database code and a  
412 portion size.

413 Energy adjusted average consumption of fruit, vegetables, red meat, processed meat,  
414 wholegrain and dairy over the week was categorised into terciles. For fish, consumption was  
415 divided into none, medium (below median consumption among consumers) and high (above  
416 median consumption). Two overall dietary scores were calculated: The Dietary Approaches  
417 to Stop Hypertension (DASH) diet score divided into quintiles (Fung et al., 2008) and the  
418 Mediterranean Diet score as a continuous measure (Trichopoulou, Costacou, Bamia, &  
419 Trichopoulos, 2003).

### 420 Metabolomic data acquisition

421 Metabolomic analysis of serum and urine was performed at the National Phenome Centre,  
422 based at Imperial College London. Samples were randomly sorted into batches of 80 and  
423 thawed to 4°C, centrifuged to remove particulate matter, and the supernatant dispensed  
424 across dedicated 96-well plates for each assay. Study-Reference (SR) samples, a pool of all

425 samples for each matrix in the study, and Long-Term Reference (LTR) samples, a pool of  
426 samples external to study, were included in each analytical run to allow for quantification and  
427 correction of technical variation. Samples are prepared and analysed daily in batches of 80  
428 study samples with the addition of 4 quality controls (2 SR and 2 LTR). Samples were  
429 maintained at 4°C during preparation for, and while awaiting, acquisition.

430 Acquisition of Nuclear Magnetic Resonance Spectroscopy (NMR) profiles (the NOESY  
431 experiment in urine and the CPMG experiment in serum) was conducted as described in  
432 (Dona et al., 2014). Lipoprotein parameters were generated by the Bruker B.I.-LISA (Bruker  
433 IVDr Lipoprotein Subclass Analysis platform, derived from NMR of serum. Spectra were  
434 acquired at 600 MHz with Bruker Ascend 600 magnets and Avance III HD consoles  
435 configured to the Bruker IVDr specification (Bruker Corporation, Billerica, MA, USA).

436 Ultra-Performance Liquid Chromatography - Mass Spectrometry (UPLC-MS) acquisitions  
437 were conducted in batches of up to 1000 study-samples, interleaved with alternating SR and  
438 LTR samples every five injections (16 per 80 samples), each batch was flanked by a serial  
439 dilution of the SR sample to assess linearity of response. Multiple analytical experiments  
440 were performed to increase metabolomic coverage. Hydrophilic interaction chromatography  
441 was performed in both urine and serum as described in (Lewis et al., 2016). Reversed-phase  
442 chromatography was performed on urine samples in both positive and negative modes as  
443 described in (Lewis et al., 2016). Lipid-targeted reverse-phase chromatography was applied  
444 in serum ionised in both positive and negative modes as described in (Sarafian et al., 2014).  
445 All UPLC-MS profiling assays were acquired on Waters G2-S ToF mass spectrometers, with  
446 Acquity UPLC chromatography systems (Waters Corporation, Milford, MA, USA).

#### 447 **Metabolomic data processing**

448 NMR spectra were automatically processed in TopSpin 3.2, followed by a suite of in house  
449 scripts (Dona et al., 2014). Each spectrum was automatically checked, before all spectra  
450 were aligned to a common reference scale. Analytical quality was further assessed manually  
451 on four factors: Line width of less than 0.9 Hz, quality of water-suppression, even baseline  
452 signal and accurate chemical shift referencing. Urine samples were referenced to an internal  
453 spiked standard 3-(trimethylsilyl)-2,2,3,3-tetradeuteriopropionic acid (TSP) at 0 ppm. Plasma  
454 samples were referenced to the  $\alpha$ -anomeric glucose doublet at 5.233 ppm. Spectra were  
455 aligned to a common reference scale, running from 10 to -1 ppm, and interpolated onto a  
456 common 20,000 point grid. Lipoprotein parameters were validated according to Bruker's  
457 B.I.-LISA protocols.

458 Chromatograms and mass spectra instrument raw files were imported into Progenesis Q1  
459 (Waters Corp. Milford, MA, USA) for retention-time alignment and feature detection.  
460 Progenesis Q1 was configured to align retention time to the central LTR sample of the  
461 acquisition. Peak detection was configured with a minimum chromatographic peak width of  
462 0.01 minutes, and automatic noise detection set to the minimum threshold of 1. Peaks  
463 arising from isotopes and chemical adducts were automatically resolved according to the  
464 observed  $m/z$  and chromatographic peak shape, and peaks areas integrated. Further  
465 processing and filtering of UPLC-MS profiling datasets was conducted with in-house scripts,  
466 and used to account for analytical run-order effects and remove noise from each dataset.

467 Analytical run-order effects were accounted for with an adaption of the method described in  
468 (Zelena et al., 2009). A robust LOWESS regression was generated per-feature, based on  
469 the SR samples, in run-order, with the window scaled to include 21 SR samples. The  
470 smoothed response values for each feature were then interpolated to the intermediate study  
471 sample injections using simple linear interpolation.

472 Finally, the median intensity of each feature in each analytical batch was aligned. Extracted  
473 features spuriously arising from analytical noise were removed from the dataset by a pair of  
474 approaches, both applied on a per-feature basis. First, a serial dilution of the study reference  
475 sample was used to assess the linearity of responses of each feature. Detected features  
476 were correlated to their expected intensity in the dilution series, and those features showing  
477 a Pearson's  $r$  of less than 0.7 were excluded from further analysis. Second, the relative  
478 standard deviation (RSD) of each feature across the study reference samples was  
479 calculated, and those features where the RSD exceeded 30%, or the observed biological  
480 variance was less than 1.5 times the RSD, were excluded.

## 481 **Metabolomic age model**

482 Untargeted NMR datasets were log-transformed (Parsons, Ludwig, Gunther, & Viant,  
483 2007), the quantified BiLISA data was log-transformed, and the UPLC-MS data were log  
484 transformed, following unit addition to every value to allow transformation of zero values.  
485 Data were then mean centred and scaled to unit variance.

486 A predictive model of metabolomic age was constructed using elastic net regression (Zou &  
487 Hastie, 2005) in the "glmnet" package (Friedman, Hastie, & Tibshirani, 2010) in R. The  
488 model was fitted on metabolic features from across all metabolomic datasets, using a multi-  
489 step process on 80% of the data (the training dataset). The remaining 20% was reserved for  
490 assessment of the predictive ability (Pearson's correlation between predicted and  
491 chronological age) of the model in an independent dataset (the test dataset). The steps were  
492 as follows:

493 Step 1 Parameterisation: Elastic net model parameters,  $\alpha$  (that defines mixing between  
494 lasso and ridge penalties) and  $\lambda$  (overall strength of penalty), were found following 10-fold  
495 cross validation. A line search across  $\alpha$ , between 0 and 1 in 0.01 increments, was performed  
496 to find the minimum mean cross-validated error (MSE) using the optimal value of  $\lambda$  found  
497 using the 'cvfit' command for each  $\alpha$  value.

498 Step 2 Leave platform out analysis: Due to potential redundancy between metabolomic  
499 datasets, we performed the parameterisation step above on data with one metabolomic  
500 platform left out each time. Platforms were removed from further analysis if model performed  
501 better (lower MSE) with their exclusion. We continued this process leaving further platforms  
502 out each time until no improvement in MSE was observed.

503 Step 3 Stability analysis: Using the selected metabolomic datasets, we repeated elastic net  
504 regression on 100 subsamples of the training dataset (a random selection of 80% each  
505 time). The metabolic features selected in each model was stored for each iteration.

506 Step 4 Metabolomic data restriction: On the same subsample for 101 iterations, the number  
507 of metabolic features available to build an elastic net model was restricted by the percentage  
508 of iterations in step 3 that a feature was selected, moving from 100% to 0%, in 1%  
509 decrements for each subsequent iteration. The correlation between predicted and  
510 chronological age in remaining 20% of training set was stored for each iteration and the  
511 percentage restriction value that gave the best correlation, was chosen for the final  
512 metabolic feature restriction in step 5.

513 Step 5 Final model building: On the complete training dataset, a final elastic net model was  
514 constructed using metabolic features restricted to those present in a set percentage of  
515 models, as found in step 4.

516 Metabolomic age acceleration (metAA) was defined as the difference between chronological  
517 age and predicted age, adjusted on actual age as previously defined for DNA methylation

518 age acceleration (Horvath, 2013). That is, we define mAA as the residuals of a linear  
519 regression between the chronological age and predicted age difference, with chronological  
520 age itself.

### 521 **Metabolic feature and pathway annotation**

522 Tentative annotations were provided for mass-spectrometry based metabolic features bases  
523 on m/z searches across the Human metabolome database (Wishart et al., 2018), for the ion  
524 forms M+2H, M+H+NH<sub>4</sub>, M+NH<sub>4</sub>, M+H, M+ACN+H, M+CH<sub>3</sub>OH+H, M+Na, M+K, 2M+H at  
525 ± 8 ppm mass tolerance.

526 For five UPLC-MS based metabolic features that were both tentatively annotated by exact  
527 mass within our metabolomic age model and also available in repeat measurements within  
528 the Northern Finnish Birth Cohort dataset, we performed further annotation procedures. Two  
529 of these annotations, for citrate (as in-source fragmentation product) and leucine (M+Na  
530 ionic form), were supported by matching retention times and accurate mass to an internal  
531 reference standard database.

532 Significantly enriched metabolic pathways were predicted using the mummichog program (Li  
533 et al., 2013). The algorithm searches tentative compound lists from metabolite reference  
534 databases against an integrated model of human metabolism to identify functional activity.  
535 Fisher's exact tests and permutation are used to infer p-values for likelihood of pathway  
536 enrichment among significant features as compared to pathways identified among the entire  
537 compound set present in reference list (the entire metabolome dataset), considering the  
538 probability of mapping the significant m/z features to pathways. Mummichog parameters  
539 were set to match against ions included in the 'generic positive mode' setting at ± 8 ppm  
540 mass tolerance.

541

### 542 **Metabolite validation in the Northern Finnish Birth Cohort 1966**

543 The Northern Finnish Birth Cohort 1966 is a prospective birth cohort that sampled 12,058  
544 live births in 1966, including 96.3% of all births in the regions of Oulu and Lapland in Finland  
545 (Rantakallio, 1988). Fasting blood samples were collected at follow-up of participants at  
546 ages 31 and 46 yrs and stored at -80 °C for subsequent biomarker profiling. A high-  
547 throughput NMR metabolomics platform was used for the analysis of 87 metabolic measures  
548 (Soininen, Kangas, Wurtz, Suna, & Ala-Korpela, 2015). This metabolomics platform provides  
549 simultaneous quantification of routine lipids and lipid concentrations of 14 lipoprotein  
550 subclasses and major sub-fractions, and further quantifies abundant fatty acids, amino acids,  
551 ketone bodies and gluconeogenesis-related metabolites in absolute concentration units.

552 We assessed changes of nine metabolites, that were available in this dataset and also  
553 included in our predictive model, between these two sampling points using 1-tailed t-tests.

### 554 **DNA methylation analysis**

555 For the microarray, bisulphite conversion of 500 ng of each DNA sample was performed  
556 using the EZ DNA Methylation-Lightning™ Kit according to the manufacturer's protocol  
557 (Zymo Research, Orange, CA). Then, bisulfite-converted DNA was used for hybridization on  
558 the Infinium HumanMethylation EPIC BeadChip, following the Illumina Infinium HD  
559 Methylation protocol. Briefly, a whole genome amplification step was followed by enzymatic  
560 end-point fragmentation and hybridization to HumanMethylation EPIC BeadChips at 48°C for  
561 17 h, followed by single nucleotide extension. The incorporated nucleotides were labelled  
562 with biotin (ddCTP and ddGTP) and 2,4-dinitrophenol (DNP) (ddATP and ddTTP). After the  
563 extension step and staining, the BeadChip was washed and scanned using the Illumina  
564 HiScan SQ scanner. The intensities of the images were extracted using the GenomeStudio



565 (v.2011.1) Methylation module (1.9.0) software, which normalizes within-sample data using  
566 different internal controls that are present on the HumanMethylation EPIC BeadChip and  
567 internal background probes. The methylation score for each CpG was represented as a  $\beta$ -  
568 value according to the fluorescent intensity ratio representing any value between 0  
569 (unmethylated) and 1 (completely methylated).

570 DNA methylation (DNAm) data were pre-processed and normalized using in-house software  
571 written for the R statistical computing environment, including background and color bias  
572 correction, quantile normalization, and Beta Mixture Quantile dilation (BMIQ) procedure to  
573 remove type I/type II probes bias, as described elsewhere (Fiorito et al., 2017). DNAm levels  
574 were expressed as the ratio of the intensities of methylated cytosines over the total  
575 intensities ( $\beta$  values). Cross-reactive and polymorphic probes - with minor allele frequency  
576 greater than 0.01 in Europeans (Y. A. Chen et al., 2013) - were excluded. Methylation  
577 measures were set to missing if the detection p-value was greater than 0.01. Samples with  
578 the bisulfite conversion control fluorescence intensity lower than 10,000 for both type I and  
579 type II probes and those with total call rate lower than 95% were excluded. Finally, samples  
580 were excluded if the predicted sex (based on chromosome X methylation) did not match that  
581 self-reported.

582 DNA methylation age was computed according to the algorithm described by Hannum et al.  
583 (Hannum et al., 2013) based on a set of 71 blood-specific age-associated CpG sites. We  
584 used this algorithm, rather than the algorithm of Hovarth, since it was developed specifically  
585 for blood samples and found to be the most predictive of mortality (B. H. Chen et al., 2016).  
586 Age acceleration (AA) was defined as the difference between epigenetic and chronological  
587 age. Since AA could be correlated with chronological age and WBC percentage, we  
588 computed the so-called intrinsic epigenetic age acceleration (B. H. Chen et al., 2016), which  
589 is defined as the residuals from the linear regression of AA with chronological age and blood  
590 cell counts (measured using flow cytometry) for neutrophils, lymphocytes, monocytes and  
591 eosinophils.

## 592 Genotyping

593 Genotyping was performed on the Illumina Infinium HumanCoreExome-12v1-1 BeadChip  
594 and quality control filters including call rate ( $\geq 97\%$ ), heterozygosity rate ( $\leq 3SD$  from the  
595 mean) were applied on the samples. Duplicated and second-degree relatives were further  
596 excluded and 14,062 samples of European ancestry based on principle component analysis  
597 remained. Markers were removed for high missing rate ( $>2\%$ ), deviation from Hardy-  
598 Weinberg equilibrium ( $P < 1E-5$ ) or minor allele frequency below 1%, resulting in 254,027  
599 high-quality and common markers. Imputation was performed using the Haplotype  
600 Reference Consortium (HRC) panel (version r1.1 2016).

601 We selected 10 SNPs, previously associated with parental attained age (Joshi et al., 2017;  
602 Pilling et al., 2017) from (Pilling et al., 2017), and tested their associations with both  
603 DNAmAA and mAA, in bivariate linear models. DNAmAA or mAA was used as the  
604 dependent variable and the dosage of the effect allele for each SNP (i.e. 0, 1 or 2) was used  
605 as the independent variable. We also defined a weighted continuous genetic risk score  
606 calculated as described in (Pilling et al., 2017) for these 10 SNPs and tested its associations  
607 with DNAmAA and mAA in bivariate linear models.

## 608 Analysis of risk factors of biological age acceleration

609 We analysed associations between mortality risk factors and age acceleration scores in  
610 separate adjusted linear regression models. To allow comparison across multiple risk  
611 factors, the adjustment set, included in all models, was chosen *a priori*. It included

612 demographic variables (sex, ethnicity, study centre, income), the 25 x 25 main NCD risk  
613 factors, (hypertension, diabetes, BMI, smoking, alcohol intake, physical activity), and dietary  
614 indicators (DASH score and fish consumption, chosen following significant bivariate  
615 associations with mAA). Considering the exploratory nature of the analysis, we considered  $p$   
616 values below 0.05 as “nominally significant” and  $p$  values below 0.0025 as significant after  
617 correction for multiple testing (Bonferroni-corrected for 10 risk factors x 2 outcomes).

## 618 Acknowledgements

619 OR was supported by a MRC Early Career Fellowship. This study was partly supported by  
620 the European Commission grant to the LIFEPAATH project (Horizon 2020 grant number  
621 633666). The Airwave Health Monitoring Study is funded by the Home Office (grant number  
622 780- TETRA) with additional support from the National Institute for Health Research (NIHR)  
623 Biomedical Research Centre. The Airwave Study uses the computing resources of the UK  
624 MEDical BIOinformatics partnership (UK MED-BIO supported by the Medical Research  
625 Council (MR/L01632X/1). We thank all Airwave participants for their contributions. We thank  
626 the late professor Paula Rantakallio (launch of NFBC1966), the participants in the 31 yrs and  
627 46 yrs studies and the NFBC project center. NFBC1966 received financial support from  
628 University of Oulu Grants no. 24000692, Oulu University Hospital Grant no. 24301140,  
629 ERDF European Regional Development Fund Grant no. 539/2010 A31592, University of  
630 Oulu Grant no. 65354, Oulu University Hospital Grant no. 2/97, 8/97, Ministry of Health and  
631 Social Affairs Grant no. 23/251/97, 160/97, 190/97, National Institute for Health and Welfare,  
632 Helsinki Grant no. 54121, Regional Institute of Occupational Health, Oulu, Finland Grant no.  
633 50621, 54231. I.K. acknowledges support from the EU PhenoMeNal project (Horizon 2020,  
634 654241).

## 635 Competing interests

636 The authors have no financial and non-financial competing interests to declare.

## 637 References

- 638
- 639 Auro, K., Joensuu, A., Fischer, K., Kettunen, J., Salo, P., Mattsson, H., . . . Perola, M. (2014). A  
640 metabolic view on menopause and ageing. *Nature Communications*, 5, 1-11.  
641 doi:10.1038/ncomms5708
- 642 Belsky, D. W., Caspi, A., Houts, R., Cohen, H. J., Corcoran, D. L., Danese, A., . . . Moffitt, T. E. (2015).  
643 Quantification of biological aging in young adults. *Proc.Natl.Acad.Sci.U.S.A*, 112(30), E4104-  
644 E4110. doi:10.1073/pnas.1506264112
- 645 Belsky, D. W., Moffitt, T. E., Cohen, A. A., Corcoran, D. L., Horvath, S., Levine, M. E., . . . Caspi, A.  
646 (2016). Telomere, epigenetic clock, and biomarker-composite quantifications of biological  
647 aging: Do they measure the same thing? *bioRxiv*, 071373-071373. doi:10.1101/071373
- 648 Brewin, C. R., Rose, S., Andrews, B., Green, J., Tata, P., McEvedy, C., . . . Foa, E. B. (2002). Brief  
649 screening instrument for post-traumatic stress disorder. *Br J Psychiatry*, 181, 158-162.
- 650 Brown, P. J., Wall, M. M., Chen, C., Levine, M. E., Yaffe, K., Roose, S. P., & Rutherford, B. R. (2017).  
651 Biological Age, Not Chronological Age, is Associated with Late Life Depression. *The Journals*  
652 *of Gerontology: Series A*, 00(00), 1-7. doi:10.1093/gerona/glx162
- 653 Burkle, A., Moreno-Villanueva, M. a., Bernhard, J. r., Blasco, M. a., Zondag, G., Hoeijmakers, J. H. J., . .  
654 . Aspinall, R. (2015). MARK-AGE biomarkers of ageing. *Mechanisms of Ageing and*  
655 *Development*, 151, 2-12. doi:10.1016/j.mad.2015.03.006
- 656 Castagne, R., Gares, V., Karimi, M., Chadeau-Hyam, M., Vineis, P., Delpierre, C., & Kelly-Irving, M.  
657 (2018). Allostatic load and subsequent all-cause mortality: which biological markers drive the

- 658 relationship? Findings from a UK birth cohort. *Eur J Epidemiol*. doi:10.1007/s10654-018-  
659 0364-1
- 660 Chaleckis, R., Murakami, I., Takada, J., Kondoh, H., & Yanagida, M. (2016). Individual variability in  
661 human blood metabolites identifies age-related differences. *Proceedings of the National  
662 Academy of Sciences of the United States of America*, 113(16), 4252-4259.  
663 doi:10.1073/pnas.1603023113
- 664 Chang, H.-C., & Guarente, L. (2013). SIRT1 Mediates Central Circadian Control in the SCN by a  
665 Mechanism that Decays with Aging. *Cell*, 153(7), 1448-1460.  
666 doi:<https://doi.org/10.1016/j.cell.2013.05.027>
- 667 Chen, B. H., Marioni, R. E., Colicino, E., Peters, M. J., Ward-Caviness, C. K., Tsai, P. C., . . . Horvath, S.  
668 (2016). DNA methylation-based measures of biological age: meta-analysis predicting time to  
669 death. *Aging (Albany NY)*, 8(9), 1844-1865. doi:10.18632/aging.101020
- 670 Chen, Y. A., Lemire, M., Choufani, S., Butcher, D. T., Grafodatskaya, D., Zanke, B. W., . . . Weksberg, R.  
671 (2013). Discovery of cross-reactive probes and polymorphic CpGs in the Illumina Infinium  
672 HumanMethylation450 microarray. *Epigenetics*, 8(2), 203-209. doi:10.4161/epi.23470
- 673 Chiu, M., Vigod, S., Rahman, F., Wilton, A. S., Lebenbaum, M., & Kurdyak, P. (2018). Mortality risk  
674 associated with psychological distress and major depression: A population-based cohort  
675 study. *Journal of Affective Disorders*, 234(February), 117-123. doi:10.1016/j.jad.2018.02.075
- 676 Claycombe, K. J., & Meydani, S. N. (2001). Vitamin E and genome stability. *Mutat Res*, 475(1-2), 37-  
677 44.
- 678 De Jager, P. L., Shulman, J. M., Chibnik, L. B., Keenan, B. T., Raj, T., Wilson, R. S., . . . Evans, D. A.  
679 (2012). A genome-wide scan for common variants affecting the rate of age-related cognitive  
680 decline. *Neurobiol Aging*, 33(5), 1017.e1011-1015.  
681 doi:10.1016/j.neurobiolaging.2011.09.033
- 682 Dona, A. C., Jimenez, B., Schafer, H., Humpfer, E., Spraul, M., Lewis, M. R., . . . Nicholson, J. K. (2014).  
683 Precision high-throughput proton NMR spectroscopy of human urine, serum, and plasma for  
684 large-scale metabolic phenotyping. *Anal Chem*, 86(19), 9887-9894. doi:10.1021/ac5025039
- 685 Dowd, J. B., Simanek, A. M., & Aiello, A. E. (2009). Socio-economic status, cortisol and allostatic load:  
686 a review of the literature. *Int J Epidemiol*, 38(5), 1297-1309. doi:10.1093/ije/dyp277
- 687 Dugue, P. A., Bassett, J. K., Joo, J. E., Baglietto, L., Jung, C. H., Wong, E. M., . . . Milne, R. L. (2018).  
688 Association of DNA Methylation-Based Biological Age With Health Risk Factors and Overall  
689 and Cause-Specific Mortality. *Am J Epidemiol*, 187(3), 529-538. doi:10.1093/aje/kwx291
- 690 Elliott, P., Vergnaud, A.-C., Singh, D., Neasham, D., Spear, J., & Heard, A. (2014). The Airwave Health  
691 Monitoring Study of police officers and staff in Great Britain: Rationale, design and methods.  
692 *Environmental research*, 134C, 280-285. doi:10.1016/j.envres.2014.07.025
- 693 Fang, Evandro F., Scheibye-Knudsen, M., Brace, Lear E., Kassahun, H., SenGupta, T., Nilsen, H., . . .  
694 Bohr, Vilhelm A. (2014). Defective Mitophagy in XPA via PARP-1 Hyperactivation and  
695 NAD+/SIRT1 Reduction. *Cell*, 157(4), 882-896. doi:<https://doi.org/10.1016/j.cell.2014.03.026>
- 696 Fiorito, G., Polidoro, S., Dugue, P. A., Kivimaki, M., Ponzzi, E., Matullo, G., . . . Vineis, P. (2017). Social  
697 adversity and epigenetic aging: a multi-cohort study on socioeconomic differences in  
698 peripheral blood DNA methylation. *Sci Rep*, 7(1), 16266. doi:10.1038/s41598-017-16391-5
- 699 Friedman, J., Hastie, T., & Tibshirani, R. (2010). Regularization Paths for Generalized Linear Models  
700 via Coordinate Descent. *J Stat Softw*, 33(1), 1-22.
- 701 Fung, T. T., Chiuve, S. E., McCullough, M. L., Rexrode, K. M., Logroscino, G., & Hu, F. B. (2008).  
702 Adherence to a DASH-style diet and risk of coronary heart disease and stroke in women.  
703 *Arch Intern Med*, 168(7), 713-720. doi:10.1001/archinte.168.7.713
- 704 Garinis, G. A., van der Horst, G. T. J., Vijg, J., & H.J. Hoeijmakers, J. (2008). DNA damage and ageing:  
705 new-age ideas for an age-old problem. *Nature Cell Biology*, 10, 1241. doi:10.1038/ncb1108-  
706 1241
- 707 Gibson, R., Eriksen, R., Lamb, K., McMeel, Y., Vergnaud, A. C., Spear, J., . . . Frost, G. (2017). Dietary  
708 assessment of British police force employees: a description of diet record coding procedures

- 709 and cross-sectional evaluation of dietary energy intake reporting (The Airwave Health  
710 Monitoring Study). *BMJ Open*, 7(4), e012927. doi:10.1136/bmjopen-2016-012927
- 711 Gomes, Ana P., Price, Nathan L., Ling, Alvin J. Y., Moslehi, Javid J., Montgomery, M. K., Rajman, L., . . .  
712 Sinclair, David A. (2013). Declining NAD+ Induces a Pseudohypoxic State Disrupting Nuclear-  
713 Mitochondrial Communication during Aging. *Cell*, 155(7), 1624-1638.  
714 doi:<https://doi.org/10.1016/j.cell.2013.11.037>
- 715 Hannum, G., Guinney, J., Zhao, L., Zhang, L., Hughes, G., Sada, S., . . . Zhang, K. (2013). Genome-  
716 wide methylation profiles reveal quantitative views of human aging rates. *Mol Cell*, 49(2),  
717 359-367. doi:10.1016/j.molcel.2012.10.016
- 718 Hertel, J., Friedrich, N., Wittfeld, K., Pietzner, M., Budde, K., Van Der Auwera, S., . . . Grabe, H. J.  
719 (2016). Measuring Biological Age via Metabonomics: The Metabolic Age Score. *Journal of*  
720 *Proteome Research*, 15(2), 400-410. doi:10.1021/acs.jproteome.5b00561
- 721 Horvath, S. (2013). DNA methylation age of human tissues and cell types. *Genome Biology*, 14(10),  
722 R115-R115. doi:10.1186/gb-2013-14-10-r115
- 723 Horvath, S., Gurven, M., Levine, M. E., Trumble, B. C., Kaplan, H., Allayee, H., . . . Assimes, T. L.  
724 (2016). An epigenetic clock analysis of race/ethnicity, sex, and coronary heart disease.  
725 *Genome Biology*, 17(1), 0-22. doi:10.1186/s13059-016-1030-0
- 726 Ito, K., Hirao, A., Arai, F., Takubo, K., Matsuoka, S., Miyamoto, K., . . . Suda, T. (2006). Reactive  
727 oxygen species act through p38 MAPK to limit the lifespan of hematopoietic stem cells.  
728 *Nature Medicine*, 12, 446. doi:10.1038/nm1388
- 729 Joshi, P. K., Pirastu, N., Kentistou, K. A., Fischer, K., Hofer, E., Schraut, K. E., . . . Wilson, J. F. (2017).  
730 Genome-wide meta-analysis associates HLA-DQA1/DRB1 and LPA and lifestyle factors with  
731 human longevity. *Nature Communications*, 8(1), 910. doi:10.1038/s41467-017-00934-5
- 732 Jylhävä, J., Pedersen, N. L., & Hägg, S. (2017). Biological Age Predictors (Vol. 21, pp. 29-36): The  
733 Authors.
- 734 Kroenke, K., Spitzer, R. L., & Williams, J. B. (2001). The PHQ-9: validity of a brief depression severity  
735 measure. *J Gen Intern Med*, 16(9), 606-613.
- 736 Laimer, M., Melmer, A., Lamina, C., Raschenberger, J., Adamovski, P., Engl, J., . . . Ebenbichler, C.  
737 (2015). Telomere length increase after weight loss induced by bariatric surgery: results from  
738 a 10 year prospective study. *International Journal Of Obesity*, 40, 773.  
739 doi:10.1038/ijo.2015.238
- 740 Levine, M. E. (2013). Modeling the rate of senescence: Can estimated biological age predict mortality  
741 more accurately than chronological age? *Journals of Gerontology - Series A Biological*  
742 *Sciences and Medical Sciences*, 68(6), 667-674. doi:10.1093/gerona/gls233
- 743 Lewis, M. R., Pearce, J. T. M., Spagou, K., Green, M., Dona, A. C., Yuen, A. H. Y., . . . Nicholson, J. K.  
744 (2016). Development and Application of Ultra-Performance Liquid Chromatography-TOF MS  
745 for Precision Large Scale Urinary Metabolic Phenotyping. *Analytical Chemistry*, 88(18), 9004-  
746 9013. doi:10.1021/acs.analchem.6b01481
- 747 Li, S., Park, Y., Duraisingham, S., Strobel, F. H., Khan, N., Soltow, Q. A., . . . Pulendran, B. (2013).  
748 Predicting Network Activity from High Throughput Metabolomics. *PLOS Computational*  
749 *Biology*, 9(7), e1003123. doi:10.1371/journal.pcbi.1003123
- 750 López-Otín, C., Blasco, M. A., Partridge, L., Serrano, M., & Kroemer, G. (2013). The hallmarks of aging  
751 (Vol. 153).
- 752 López-Otín, C., Galluzzi, L., Freije, J. M. P., Madeo, F., & Kroemer, G. (2016). Metabolic Control of  
753 Longevity (Vol. 166, pp. 802-821).
- 754 Marazziti, D., Rutigliano, G., Baroni, S., Landi, P., & Dell'Osso, L. (2014). Metabolic syndrome and  
755 major depression (Vol. 19, pp. 293-304).
- 756 Marioni, R. E., Harris, S. E., Zhang, Q., McRae, A. F., Hagenaars, S. P., Hill, W. D., . . . Visscher, P. M.  
757 (2018). GWAS on family history of Alzheimer's disease. *Transl Psychiatry*, 8(1), 99.  
758 doi:10.1038/s41398-018-0150-6

- 759 McDaid, A. F., Joshi, P. K., Porcu, E., Komljenovic, A., Li, H., Sorrentino, V., . . . Kutalik, Z. (2017).  
760 Bayesian association scan reveals loci associated with human lifespan and linked biomarkers.  
761 *Nature Communications*, 8(May). doi:10.1038/ncomms15842
- 762 McEwen, B. S., & Seeman, T. (1999). Protective and damaging effects of mediators of stress.  
763 Elaborating and testing the concepts of allostasis and allostatic load. *Ann N Y Acad Sci*, 896,  
764 30-47.
- 765 Moffitt, T. E., Belsky, D. W., Danese, A., Poulton, R., & Caspi, A. (2017). The Longitudinal Study of  
766 Aging in Human Young Adults: Knowledge Gaps and Research Agenda. *The journals of*  
767 *gerontology. Series A, Biological sciences and medical sciences*, 72(2), 210-215.  
768 doi:10.1093/geron/glw191
- 769 Muezzinler, A., Zaineddin, A. K., & Brenner, H. (2013). A systematic review of leukocyte telomere  
770 length and age in adults. *Ageing Res Rev*, 12(2), 509-519. doi:10.1016/j.arr.2013.01.003
- 771 Parsons, H. M., Ludwig, C., Gunther, U. L., & Viant, M. R. (2007). Improved classification accuracy in  
772 1- and 2-dimensional NMR metabolomics data using the variance stabilising generalised  
773 logarithm transformation. *BMC Bioinformatics*, 8, 234. doi:10.1186/1471-2105-8-234
- 774 Partridge, L., Deelen, J., & Slagboom, P. E. (2018). Facing up to the global challenges of ageing.  
775 *Nature*, 561(7721), 45-56. doi:10.1038/s41586-018-0457-8
- 776 Peters, M. J., Joehanes, R., Pilling, L. C., Schurmann, C., Conneely, K. N., Powell, J., . . . Singleton, A. B.  
777 (2015). The transcriptional landscape of age in human peripheral blood. *Nature*  
778 *Communications*, 6. doi:10.1038/ncomms9570
- 779 Pilling, L. C., Kuo, C. L., Sicinski, K., Tamosauskaite, J., Kuchel, G. A., Harries, L. W., . . . Melzer, D.  
780 (2017). Human longevity: 25 genetic loci associated in 389,166 UK biobank participants.  
781 *Aging (Albany NY)*, 9(12), 2504-2520. doi:10.18632/aging.101334
- 782 Rantakallio, P. (1988). The longitudinal study of the northern Finland birth cohort of 1966. *Paediatr*  
783 *Perinat Epidemiol*, 2(1), 59-88.
- 784 Rist, M. J., Roth, A., Frommherz, L., Weinert, C. H., Krüger, R., Merz, B., . . . Watzl, B. (2017).  
785 Metabolite patterns predicting sex and age in participants of the Karlsruhe Metabolomics  
786 and Nutrition (KarMeN) study. *PLoS ONE*, 12(8), 1-21. doi:10.1371/journal.pone.0183228
- 787 Sahar, S., Masubuchi, S., Eckel-Mahan, K., Vollmer, S., Galla, L., Ceglia, N., . . . Sassone-Corsi, P.  
788 (2014). Circadian Control of Fatty Acid Elongation by SIRT1 Protein-mediated Deacetylation  
789 of Acetyl-coenzyme A Synthetase 1. *Journal of Biological Chemistry*, 289(9), 6091-6097.  
790 doi:10.1074/jbc.M113.537191
- 791 Sala, M. L., Röell, B., van der Bijl, N., van der Grond, J., de Craen, A. J. M., Slagboom, E. P., . . . Kroft, L.  
792 J. M. (2015). Genetically determined prospect to become long-lived is associated with less  
793 abdominal fat and in particular less abdominal visceral fat in men. *Age and Ageing*, 44(4),  
794 713-717. doi:10.1093/ageing/afv063
- 795 Sarafian, M. H., Gaudin, M., Lewis, M. R., Martin, F. P., Holmes, E., Nicholson, J. K., & Dumas, M. E.  
796 (2014). Objective set of criteria for optimization of sample preparation procedures for ultra-  
797 high throughput untargeted blood plasma lipid profiling by ultra performance liquid  
798 chromatography-mass spectrometry. *Anal Chem*, 86(12), 5766-5774. doi:10.1021/ac500317c
- 799 Soininen, P., Kangas, A. J., Wurtz, P., Suna, T., & Ala-Korpela, M. (2015). Quantitative serum nuclear  
800 magnetic resonance metabolomics in cardiovascular epidemiology and genetics. *Circ*  
801 *Cardiovasc Genet*, 8(1), 192-206. doi:10.1161/circgenetics.114.000216
- 802 Stringhini, S., Carmeli, C., Jokela, M., Avendano, M., Muennig, P., Guida, F., . . . Kivimaki, M. (2017).  
803 Socioeconomic status and the 25 x 25 risk factors as determinants of premature mortality: a  
804 multicohort study and meta-analysis of 1.7 million men and women. *Lancet*, 389(10075),  
805 1229-1237. doi:10.1016/s0140-6736(16)32380-7
- 806 Su, X., Wellen, K. E., & Rabinowitz, J. D. (2016). Metabolic control of methylation and acetylation.  
807 *Current Opinion in Chemical Biology*, 30, 52-60.  
808 doi:<https://doi.org/10.1016/j.cbpa.2015.10.030>

- 809 The IPAQ group. (2016). International Physical Activity Questionnaire. Retrieved from  
810 <http://www.ipaq.ki.se/>
- 811 Trichopoulou, A., Costacou, T., Bamia, C., & Trichopoulos, D. (2003). Adherence to a Mediterranean  
812 diet and survival in a Greek population. *N Engl J Med*, *348*(26), 2599-2608.  
813 doi:10.1056/NEJMoa025039
- 814 Verdin, E. (2015). NAD+ in aging, metabolism, and neurodegeneration. *Science*, *350*(6265), 1208-  
815 1213. doi:10.1126/science.aac4854
- 816 Wishart, D. S., Feunang, Y. D., Marcu, A., Guo, A. C., Liang, K., Vazquez-Fresno, R., . . . Scalbert, A.  
817 (2018). HMDB 4.0: the human metabolome database for 2018. *Nucleic Acids Res*, *46*(D1),  
818 D608-d617. doi:10.1093/nar/gkx1089
- 819 Wolf, E. J., & Morrison, F. G. (2017). Traumatic Stress and Accelerated Cellular Aging: From  
820 Epigenetics to Cardiometabolic Disease (Vol. 19): Current Psychiatry Reports.
- 821 World Health Organisation. (2013). *Global action plan for the prevention and control of*  
822 *noncommunicable diseases 2013–2020*. Retrieved from
- 823 Yu, Z., Zhai, G., Singmann, P., He, Y., Xu, T., Prehn, C., . . . Wang-Sattler, R. (2012). Human serum  
824 metabolic profiles are age dependent. *Aging Cell*, *11*(6), 960-967. doi:10.1111/j.1474-  
825 9726.2012.00865.x
- 826 Zelena, E., Dunn, W. B., Broadhurst, D., Francis-McIntyre, S., Carroll, K. M., Begley, P., . . . Kell, D. B.  
827 (2009). Development of a robust and repeatable UPLC-MS method for the long-term  
828 metabolomic study of human serum. *Anal Chem*, *81*(4), 1357-1364. doi:10.1021/ac8019366
- 829 Zhao, L. G., Sun, J. W., Yang, Y., Ma, X., Wang, Y. Y., & Xiang, Y. B. (2016). Fish consumption and all-  
830 cause mortality: a meta-analysis of cohort studies. *Eur J Clin Nutr*, *70*(2), 155-161.  
831 doi:10.1038/ejcn.2015.72
- 832 Zigmond, A. S., & Snaith, R. P. (1983). The hospital anxiety and depression scale. *Acta Psychiatr*  
833 *Scand*, *67*(6), 361-370.
- 834 Zou, H., & Hastie, T. (2005). Regularization and variable selection via the elastic net. *Journal of the*  
835 *Royal Statistical Society: Series B (Statistical Methodology)*, *67*(2), 301-320.  
836 doi:doi:10.1111/j.1467-9868.2005.00503.x
- 837
- 838

839 **Supplementary figures and tables**

840

841 **Table s1: Summary of metabolomic platforms used in analysis**

| Platform      | Sample | Abbreviation | Details                                                                                                                                                                                   | N features/<br>spectral<br>resolution |
|---------------|--------|--------------|-------------------------------------------------------------------------------------------------------------------------------------------------------------------------------------------|---------------------------------------|
| NMR<br>NOESY  | urine  | uNMR         | highly robust, repeatable and precise platform for the detection of small molecules in human biofluids                                                                                    | 24493                                 |
| MS HPOS       | urine  | uHPOS        | Hydrophilic interaction chromatography (HILIC), provides enhanced separation of small, highly polar molecules ionised in positive mode                                                    | 7325                                  |
| MS RPOS       | urine  | uRPOS        | Reversed-phase chromatography targets small moderately polar molecules, ionised in positive and negative modes                                                                            | 14300                                 |
| MS RNEG       | urine  | uRNEG        |                                                                                                                                                                                           | 14481                                 |
| NMR<br>CPMG   | serum  | sNMR         | highly robust, repeatable and precise platform for the detection of small molecules in human biofluids                                                                                    | 23571                                 |
| NMR<br>BiLISA | serum  | sBiLISA      | Quantifies cholesterol, free cholesterol, phospholipids, triglycerides, apolipoproteins A1, A2, B and particle numbers for the primary plasma and serum lipoproteins and their subclasses | 105                                   |
| MS HPOS       | serum  | sHPOS        | Hydrophilic interaction chromatography (HILIC), provides enhanced separation of small, highly polar molecules ionised in positive mode                                                    | 1505                                  |
| MS LPOS       | serum  | sLPOS        | lipid-targeted reverse-phase chromatography provides maximal resolution of fattyacids, triglycerides, and phospholipids, , ionised in positive and negative modes                         | 7211                                  |
| MS LNEG       | serum  | sLNEG        |                                                                                                                                                                                           | 5833                                  |

842

843 **Table s2: Model predictors with coefficients**

844 *Please see separate excel file.*

845 **Table s3 Tentative annotations of model predictors**

846 *Please see separate excel file.*

847

848 **Table s4: Demographic and covariate information of participants with DNA**  
 849 **methylation data, and bivariate associations with DNA methylation age acceleration**

|                                         |                          | N (%) or Mean (SD) | Bivariate association with DNA methylation Age Acceleration |          |
|-----------------------------------------|--------------------------|--------------------|-------------------------------------------------------------|----------|
|                                         |                          |                    | $\beta$ (95% CI)                                            | p value  |
| <b>Demographic and NCD risk factors</b> |                          |                    |                                                             |          |
| <b>age</b>                              | years                    | 41.6 (9.27)        | -                                                           | -        |
| <b>sex</b>                              | Female                   | 445 (40.4)         | -                                                           | -        |
|                                         | Male                     | 657 (59.6)         | 0.89 (0.47, 1.3)                                            | 3.50E-05 |
| <b>Marital status</b>                   | Married/cohabiting       | 858 (80.1)         | -                                                           | -        |
|                                         | other                    | 213 (19.9)         | -0.02 (-0.55, 0.5)                                          | 0.94     |
| <b>ethnicity</b>                        | White                    | 1073 (97.4)        | -                                                           | -        |
|                                         | other                    | 29 (2.6)           | -0.33 (-1.62, 0.96)                                         | 0.62     |
| <b>BMI</b>                              | <25                      | 354 (32.1)         | -                                                           | -        |
|                                         | >=25 & < 30 (overweight) | 526 (47.7)         | 0.19 (-0.28, 0.66)                                          | 0.43     |
|                                         | >=30 (obese)             | 222 (20.1)         | 0.13 (-0.46, 0.72)                                          | 0.67     |
| <b>diabetic status</b>                  | Normal                   | 1058 (96.1)        | -                                                           | -        |
|                                         | Diabetic                 | 43 (3.9)           | 0.33 (-0.73, 1.4)                                           | 0.54     |
| <b>Hypertension</b>                     | No                       | 730 (66.3)         | -                                                           | -        |
|                                         | Yes                      | 371 (33.7)         | 0.13 (-0.3, 0.57)                                           | 0.55     |
| <b>Income</b>                           | High                     | 413 (37.7)         | -                                                           | -        |
|                                         | Medium                   | 406 (37)           | 0.04 (-0.44, 0.52)                                          | 0.87     |
|                                         | Low                      | 277 (25.3)         | 0.38 (-0.15, 0.91)                                          | 0.16     |
| <b>Alcohol consumption</b>              | None                     | 79 (7.2)           | -                                                           | -        |
|                                         | Moderate                 | 944 (85.7)         | 0.16 (-0.65, 0.96)                                          | 0.7      |
|                                         | Heavy                    | 78 (7.1)           | 0.46 (-0.64, 1.55)                                          | 0.41     |
| <b>smoking</b>                          | Non-smoker               | 719 (65.2)         | -                                                           | -        |
|                                         | Former smoker            | 269 (24.4)         | -0.07 (-0.56, 0.42)                                         | 0.79     |
|                                         | Current smoker           | 114 (10.3)         | -0.45 (-1.14, 0.24)                                         | 0.2      |
| <b>Physical activity</b>                | High                     | 629 (57.1)         | -                                                           | -        |
|                                         | Moderate                 | 296 (26.9)         | -0.26 (-0.74, 0.22)                                         | 0.29     |
|                                         | Low                      | 177 (16.1)         | -0.27 (-0.85, 0.31)                                         | 0.36     |
| <b>Psychological factors</b>            |                          |                    |                                                             |          |
| <b>Depression diagnosis</b>             | Normal                   | 753 (68.4)         | -                                                           | -        |
|                                         | Minimal symptoms         | 254 (23.1)         | 0.01 (-0.49, 0.51)                                          | 0.97     |
|                                         | Depression               | 94 (8.5)           | -0.16 (-0.92, 0.59)                                         | 0.67     |
| <b>Anxiety diagnosis</b>                | Normal                   | 842 (78.3)         | -                                                           | -        |
|                                         | Borderline               | 140 (13)           | -0.3 (-0.93, 0.33)                                          | 0.35     |



|                                            |                     |                |                     |       |
|--------------------------------------------|---------------------|----------------|---------------------|-------|
| <b>Experienced trauma in last 6 months</b> | Anxiety case        | 94 (8.7)       | 0.38 (-0.37, 1.13)  | 0.32  |
|                                            | No                  | 935 (84.8)     | -                   | -     |
|                                            | Yes, without PTSD   | 150 (13.6)     | -0.09 (-0.7, 0.51)  | 0.76  |
|                                            | Yes, with PTSD      | 17 (1.5)       | 1.4 (-0.28, 3.08)   | 0.1   |
| <b>Dietary variables</b>                   |                     |                |                     |       |
| <b>Fish consumption</b>                    | None                | 269 (29.1)     | -                   | -     |
|                                            | Medium              | 333 (36.1)     | 0 (-0.58, 0.58)     | 1     |
|                                            | High                | 321 (34.8)     | -0.12 (-0.71, 0.46) | 0.68  |
| <b>Fruit consumption</b>                   | Low                 | 295 (32)       | -                   | -     |
|                                            | Medium              | 299 (32.4)     | 0.55 (-0.03, 1.13)  | 0.063 |
|                                            | High                | 329 (35.6)     | -0.02 (-0.59, 0.54) | 0.94  |
| <b>Red meat consumption</b>                | Low                 | 297 (32.2)     | -                   | -     |
|                                            | Medium              | 330 (35.8)     | -0.13 (-0.7, 0.43)  | 0.64  |
|                                            | High                | 296 (32.1)     | -0.14 (-0.72, 0.44) | 0.64  |
| <b>Vegetable consumption</b>               | Low                 | 299 (32.4)     | -                   | -     |
|                                            | Medium              | 306 (33.2)     | 0.22 (-0.35, 0.8)   | 0.45  |
|                                            | High                | 318 (34.5)     | -0.19 (-0.76, 0.38) | 0.51  |
| <b>Whole grain consumption</b>             | Low                 | 308 (33.4)     | -                   | -     |
|                                            | Medium              | 294 (31.9)     | 0.12 (-0.45, 0.7)   | 0.68  |
|                                            | High                | 321 (34.8)     | -0.1 (-0.66, 0.46)  | 0.72  |
| <b>DASH score</b>                          | <20 (least healthy) | 153 (16.6)     | -                   | -     |
|                                            | ≥20 and <23         | 172 (18.6)     | -0.16 (-0.94, 0.63) | 0.69  |
|                                            | ≥23 and <25         | 149 (16.1)     | 0.2 (-0.61, 1.02)   | 0.62  |
|                                            | ≥25 and <28         | 183 (19.8)     | 0.43 (-0.34, 1.21)  | 0.27  |
|                                            | > 28 (most healthy) | 266 (28.8)     | -0.01 (-0.73, 0.71) | 0.98  |
| <b>Mediterranean diet score</b>            | continuous (1-10)   | 4.8 (1.81)     | -0.02 (-0.15, 0.11) | 0.72  |
| <b>Clinical biomarkers</b>                 |                     |                |                     |       |
| <b>SYSTOLIC Blood pressure</b>             | mmHg                | 131.19 (15.79) | 0.01 (0, 0.02)      | 0.13  |
| <b>DIASTOLIC Blood pressure</b>            | mmHg                | 79.53 (10.23)  | 0.02 (-0.01, 0.04)  | 0.14  |
| <b>PULSE</b>                               | beats/minute        | 70.69 (11.34)  | -0.02 (-0.03, 0)    | 0.076 |
| <b>FIBRINOGEN</b>                          | g/L                 | 3.86 (1.01)    | -0.1 (-0.31, 0.1)   | 0.32  |
| <b>PROTHROMBIN TIME</b>                    | seconds             | 13.57 (1.67)   | -0.01 (-0.14, 0.11) | 0.81  |
| <b>C-REACTIVE PROTEIN</b>                  | mg/l                | 1.92 (2.8)     | 0.01 (-0.07, 0.08)  | 0.83  |
| <b>CREATININE</b>                          | μmol / L            | 91.51 (13)     | 0.02 (0, 0.04)      | 0.014 |
| <b>TOTAL CHOLESTEROL</b>                   | mmol/l              | 5.26 (1.03)    | -0.14 (-0.34, 0.06) | 0.17  |
| <b>High Density Lipoprotein</b>            | mmol/L              | 1.51 (0.4)     | -0.52 (-1.04, 0)    | 0.049 |

|                               |          |                  |                          |       |
|-------------------------------|----------|------------------|--------------------------|-------|
| <b>γ-glutamyl transferase</b> | U/L      | 31.05<br>(23.49) | 0.01 (0, 0.02)           | 0.01  |
| <b>APOLIPOPROTEIN A</b>       | g/L      | 1.36 (0.36)      | -0.61 (-1.18, -<br>0.04) | 0.036 |
| <b>APOLIPOPROTEIN B</b>       | g/L      | 0.93 (0.23)      | -0.55 (-1.44,<br>0.33)   | 0.22  |
| <b>% Glycated haemoglobin</b> | %        | 5.64 (0.56)      | -0.01 (-0.38,<br>0.36)   | 0.95  |
| <b>UREA</b>                   | μmol / L | 5.01 (1.15)      | 0.14 (-0.04,<br>0.32)    | 0.12  |

850

851

852 **Table s5: Association of lifespan-related SNPs with age acceleration scores**

853

| Implicated gene(s)              | SNP        | CHR | BP        | A1 | A0 | Association with parental lifespan <sup>a</sup> |         | Association with mAA |         | Association with DNAmAA |         |
|---------------------------------|------------|-----|-----------|----|----|-------------------------------------------------|---------|----------------------|---------|-------------------------|---------|
|                                 |            |     |           |    |    | Beta                                            | p-value | Beta (95% CI)        | p-value | Beta (95% CI)           | p-value |
| <i>CLESR2 ...<br/>PSRC1</i>     | rs602633   | 1   | 109821511 | T  | G  | -0.0150                                         | 2.7E-08 | 0.00 (-0.26, 0.25)   | 0.98    | 0.12 (-0.24, 0.48)      | 0.51    |
| <i>HLA-DRB1...<br/>HLA-DQA1</i> | rs28383322 | 6   | 32592796  | C  | T  | 0.018                                           | 5.3E-11 | -0.3 (-0.57, -0.02)  | 0.03    | -0.11 (-0.47, 0.26)     | 0.57    |
| <i>LPA</i>                      | rs55730499 | 6   | 161005610 | C  | T  | -0.0361                                         | 1.7E-18 | 0.01 (-0.39, 0.4)    | 0.98    | 0.14 (-0.41, 0.69)      | 0.62    |
| <i>EPHX2</i>                    | rs7844965  | 8   | 27442064  | G  | A  | 0.015                                           | 7.7E-09 | 0.01 (-0.23, 0.26)   | 0.91    | 0.05 (-0.29, 0.39)      | 0.78    |
| <i>CDKN2B-AS1<br/>(ANRIL)</i>   | rs1556516  | 9   | 22100176  | G  | C  | -0.0181                                         | 4.7E-16 | 0.01 (-0.21, 0.22)   | 0.95    | -0.12 (-0.41, 0.18)     | 0.45    |
| <i>SH2B3/ATXN2</i>              | rs7137828  | 12  | 111932800 | C  | T  | 0.017                                           | 3.4E-14 | 0.03 (-0.18, 0.24)   | 0.80    | -0.02 (-0.33, 0.28)     | 0.89    |
| <i>PROX2</i>                    | rs61978928 | 14  | 75321714  | T  | C  | 0.014                                           | 2.0E-08 | 0.02 (-0.21, 0.25)   | 0.86    | 0.07 (-0.25, 0.39)      | 0.66    |
| <i>CHRNA3</i>                   | rs1317286  | 15  | 78896129  | A  | G  | -0.0254                                         | 1.2E-26 | -0.04 (-0.27, 0.18)  | 0.70    | -0.18 (-0.49, 0.13)     | 0.25    |
| <i>FURIN</i>                    | rs17514846 | 15  | 91416550  | C  | A  | -0.0139                                         | 7.1E-10 | 0.03 (-0.18, 0.24)   | 0.77    | 0.14 (-0.15, 0.43)      | 0.34    |
| <i>APOE/APOC1</i>               | rs429358   | 19  | 45411941  | T  | C  | -0.0566                                         | 1.4E-74 | -0.28 (-0.58, 0.01)  | 0.05    | -0.38 (-0.78, 0.03)     | 0.07    |

854

855

856

857

858

<sup>a</sup> Reproduced from (Pilling et al., 2017). For parental attained age (Martingale residuals) a negative BETA = reduced hazard, i.e. increased attained age. Implicated gene(s) = Variants in locus usually intronic, or exonic (indicated by underlining). If two genes separated by dots, the SNP is intergenic. BP = Genomic position, build 37 (hg19). Betas = A1 effect on outcome.

859 **Figure s1: Results of 'leave platform out' stage of model building**

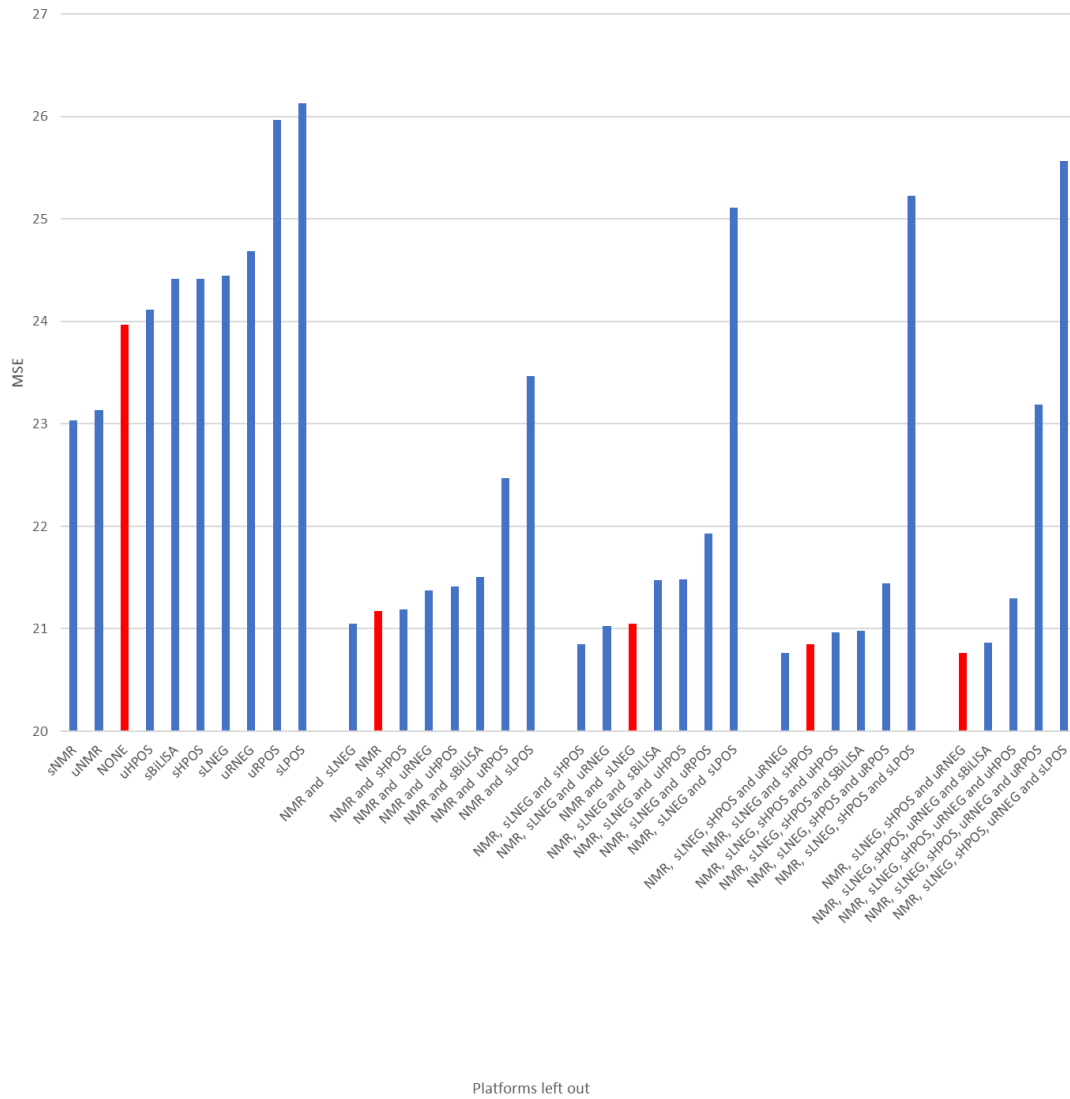

860
